# Supplementary material for: COVID-19 Vaccine Hesitancy among Parents of Children with Chronic Liver Diseases
Source: Vaccines (Basel). 2022 Dec 7;10(12):2094. doi: 10.3390/vaccines10122094 (PMC9783335; doi:10.3390/vaccines10122094)
Supplement: Supplementary file 1 [file vaccines-10-02094-s001.zip › Supplementary S2, S3 (additional table and figures).pdf]

## Supplementary S2

**Supplementary Table S1.** Multi-collinearity test for exogenous variables with all endogenous variables

| Exogenous Variable Name | Mediator Variable Name |       |                  |       | Dependent Variable Name                       |       |
|-------------------------|------------------------|-------|------------------|-------|-----------------------------------------------|-------|
|                         | Safety & efficacy      |       | Attitude & Trust |       | Hesitancy of Parents About Childhood Vaccines |       |
|                         | Tolerance              | VIF   | Tolerance        | VIF   | Tolerance                                     | VIF   |
| Child age               | 0.948                  | 1.055 | 0.936            | 1.068 | 0.936                                         | 1.068 |
| Illiterate              | 0.774                  | 1.292 | 0.767            | 1.304 | 0.767                                         | 1.304 |
| Low educational level   | 0.830                  | 1.205 | 0.829            | 1.206 | 0.829                                         | 1.206 |
| Family size             | 0.938                  | 1.066 | 0.927            | 1.079 | 0.927                                         | 1.079 |
| Income                  | 0.858                  | 1.166 | 0.852            | 1.174 | 0.852                                         | 1.174 |
| Child sex               | 0.968                  | 1.033 | 0.967            | 1.035 | 0.967                                         | 1.035 |

A multi-collinearity test was done for all exogenous variables with all endogenous variables (dependent variable and mediator variables) and no inter-correlation was found where all tolerance values were more than 0.2, also VIF (Variance Inflation Factor) were less than 5, as it is clear in the following table supplementary table 1. The following two figures supplementary figure 1 and 2 emphasized that there is no heteroscedecity, on other words the [variance](#) around the [regression line](#) is the same for all values of the predictor variable so the assumption of homoscedasticity is met.

## Supplementary S3

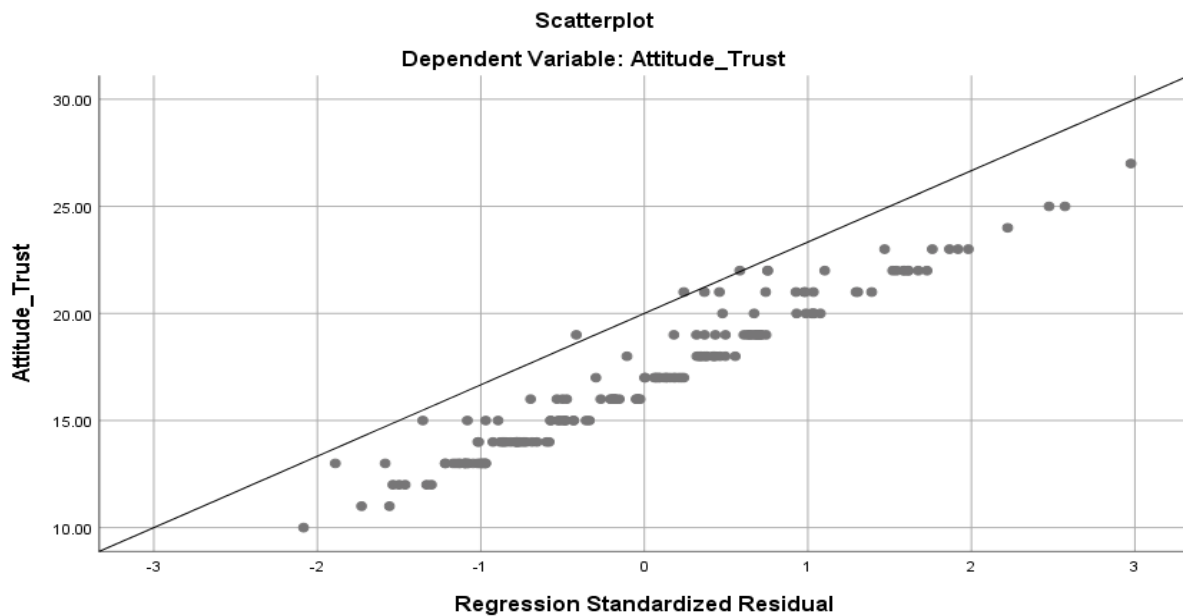

**Supplementary Figure S1.** Scatter Plot for the relation between the regression standardized residual and the dependent variable Attitude and Trust

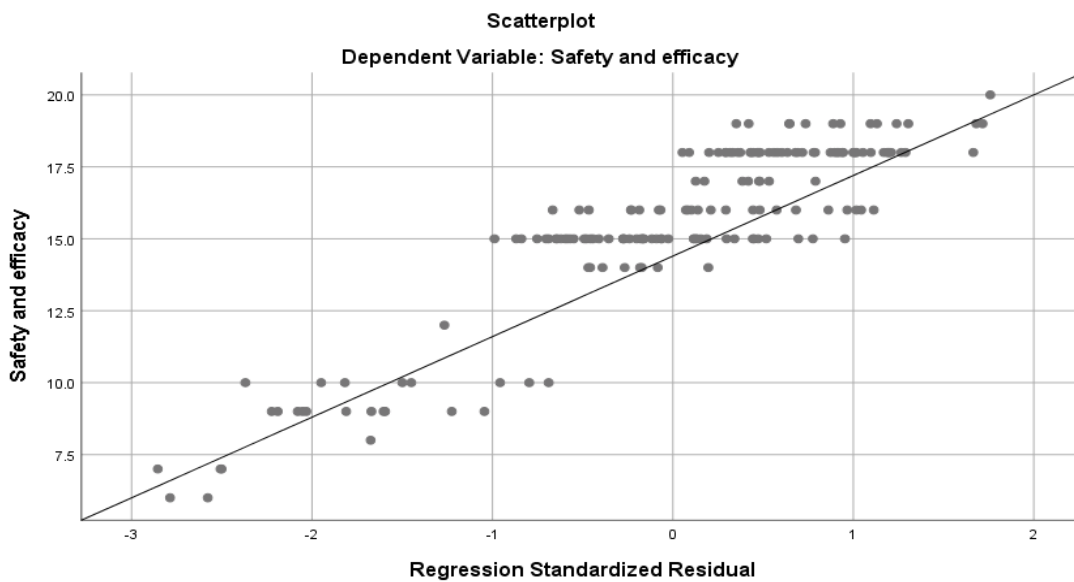

**Supplementary Figure S2.** Scatter Plot for the relation between the regression standardized residual and the dependent variable Safety and Efficacy
