# Supplementary material for: COVID-19 Vaccine Hesitancy among Parents of Children with Chronic Liver Diseases
Source: Vaccines (Basel). 2022 Dec 7;10(12):2094. doi: 10.3390/vaccines10122094 (PMC9783335; doi:10.3390/vaccines10122094)
Supplement: Supplementary file 1 [file vaccines-10-02094-s001.zip › Supplementary S4 (FULL DATA).xls]

## Sheet: (VACCINES) DATA extraction
n	Timestamp	Doyouhavechronicdiseasechild	NofChronicdiseasechildreninfamily	site	Governorate	Gender	Age	Age2	Relationtothechild	Relationchild	Levelofeducation	Levelofeducation_n	Workplace	Durationofwork	WorkSector	HealthInsurance	Income	income_n	Olderadultslivinginthesamehome	Fsize	Familysize	Familysize_n	PreviousCOVID19infection	COVID19vaccinestatus	causesofnoncomplinceCOVIDvacine	HTN	Rheumaticandimmunediseases	physicaldisapplities	Liverandkidneydiseases	DM	parentchronicdisease	Parentwithchronicdiseases	child age	child sex	childwithpreviousCOVID19Infection	childchronicdisease	others	Rheumaticandimmunediseases	Liverandkidneydiseases	Chestdisease	childreceivedscheduledvaccines	childreceivedinfluenzavaccinelast2years	parentscovidvaccinintentionCLDchild	parentscovidvaccinintentionCLDCHILD	ParentsintentionstoallowCOVID19vaccinationfor1rstchild	DV1	achoicespecifictypeofCOVIDvaccine		PACV questions
75	2022-08-23 18:41:29	Yes	1	NLI	Gharbia	Male	50-59 year	>=40 year	Father	Father	Illiterate	Illiterate	Not employed	Not employed	Non Health	No	Not enough; on a loan but can pay back	Not Enough	No	>5	>5	6	No	Took the three doses	N/A	Yes	No	No	No	No	Yes	HTN	12	Female	No	Liver and kidney diseases, Rheumatic and immune diseases	#NULL!	Yes	Yes	#NULL!	Yes	No	agree or already took the COVID vaccin	already took COVID vaccine	already took COVID vaccine	already took COVID vaccine	P fizer
106	2022-09-16 15:49:59	Yes	1	NLI	Monufia	Female	50-59 year	>=40 year	Mother	Mother	Illiterate	Illiterate	Not employed	Not employed	Non Health	No	Enough	Enough	No	>5	>5	6	No	Took the first dose and is awaiting the second	awaiting the second	No	No	No	No	No	No	No	17	Female	No	Liver and kidney diseases, Rheumatic and immune diseases	#NULL!	Yes	Yes	#NULL!	Yes	No	agree or already took the COVID vaccin	already took COVID vaccine	already took COVID vaccine	already took COVID vaccine	P fizer
8	2022-05-25 16:02:53	Yes	1	NLI	Damietta	Female	40-49 year	>=40 year	Mother	Mother	Preparatory educattion	low educated	Not employed	Not employed	Non Health	No	Enough	Enough	Yes	>5	>5	6	Yes	Took the first and second doses and is awaiting the booster dose	N/A	No	No	No	No	No	No	No	17	Female	No	Liver and kidney diseases	#NULL!	#NULL!	Yes	#NULL!	Yes	No	agree or already took the COVID vaccin	already took COVID vaccine	already took COVID vaccine	already took COVID vaccine	P fizer
10	2022-05-30 10:24:28	Yes	3	NLI	Monufia	Male	30-39 year	<40 year	Father	Father	Preparatory educattion	low educated	Private	Full Time	Non Health	No	Enough	Enough	Yes	>5	>5	6	No	Took the first and second doses and is awaiting the booster dose	awaiting the second	No	No	No	No	No	No	No	14	Male	Yes	Others	Yes	#NULL!	#NULL!	#NULL!	Yes	No	agree or already took the COVID vaccin	already took COVID vaccine	already took COVID vaccine	already took COVID vaccine	Don't Know
13	2022-05-30 10:54:28	Yes	3	NLI	Port Said	Female	30-39 year	<40 year	Mother	Mother	Preparatory educattion	low educated	Not employed	Not employed	Non Health	Governmental	Enough	Enough	No	>5	>5	6	No	Does not want to take the vaccine	N/A	No	No	No	No	No	Yes	Others	17	Female	No	Others	Yes	#NULL!	#NULL!	#NULL!	Yes	Yes	agree or already took the COVID vaccin	already took COVID vaccine	already took COVID vaccine	already took COVID vaccine	Don't Know
18	2022-06-12 22:08:20	Yes	2	NLI	Monufia	Female	40-49 year	>=40 year	Mother	Mother	Preparatory educattion	low educated	Private	Full Time	Non Health	No	Not enough; on a loan and cannot pay back	Not Enough	Yes	4-5	5	5	Yes	Took the first and second doses and is awaiting the booster dose	N/A	No	No	No	No	No	No	No	15	Female	Yes	Rheumatic and immune diseases	#NULL!	Yes	#NULL!	#NULL!	Yes	No	agree or already took the COVID vaccin	already took COVID vaccine	already took COVID vaccine	already took COVID vaccine	P fizer
49	2022-08-01 10:03:43	Yes	1	NLI	Monufia	Female	40-49 year	>=40 year	Mother	Mother	Preparatory educattion	low educated	Not employed	Not employed	Non Health	No	Enough	Enough	Yes	>5	>5	6	No	Took the first and second doses and is awaiting the booster dose	N/A	No	No	No	No	No	No	No	17	Female	No	Rheumatic and immune diseases	#NULL!	Yes	#NULL!	#NULL!	Yes	No	agree or already took the COVID vaccin	already took COVID vaccine	already took COVID vaccine	already took COVID vaccine	Don't Know
55	2022-08-05 13:03:53	Yes	1	NLI	Monufia	Male	50-59 year	>=40 year	Father	Father	Write and read	low educated	Government	Full Time	Health	Governmental	Enough	Enough	Yes	>5	>5	6	No	Took the first and second doses and is awaiting the booster dose	N/A	Yes	No	No	No	No	Yes	HTN	17	Male	No	Liver and kidney diseases	#NULL!	#NULL!	Yes	#NULL!	Yes	No	agree or already took the COVID vaccin	already took COVID vaccine	already took COVID vaccine	already took COVID vaccine	Don't Know
89	2022-09-12 21:40:59	Yes	1	NLI	Qalyubia	Female	40-49 year	>=40 year	Mother	Mother	Preparatory educattion	low educated	Not employed	Not employed	Non Health	No	Enough	Enough	No	>5	>5	6	Yes	Took the first and second doses and is awaiting the booster dose	N/A	No	No	No	No	No	No	No	18	Female	Not sure	Liver and kidney diseases, Rheumatic and immune diseases	#NULL!	Yes	Yes	#NULL!	Yes	No	agree or already took the COVID vaccin	already took COVID vaccine	already took COVID vaccine	already took COVID vaccine	P fizer
99	2022-09-15 14:52:40	Yes	1	NLI	Monufia	Male	50-59 year	>=40 year	Father	Father	Preparatory educattion	low educated	Government	Full Time	Non Health	Governmental	Enough	Enough	Yes	>5	>5	6	Yes	Took the first and second doses and is awaiting the booster dose	N/A	No	No	No	No	No	No	No	15	Male	No	Liver and kidney diseases, Rheumatic and immune diseases, Chest diseases	#NULL!	Yes	Yes	Yes	Yes	Yes	agree or already took the COVID vaccin	already took COVID vaccine	already took COVID vaccine	already took COVID vaccine	P fizer
101	2022-09-15 14:59:55	Yes	1	NLI	Gharbia	Male	50-59 year	>=40 year	Father	Father	Preparatory educattion	low educated	Government	Full Time	Non Health	Governmental	Enough	Enough	No	>5	>5	6	No	Took the first and second doses and is awaiting the booster dose	N/A	No	No	No	No	Yes	Yes	DM	17	Male	No	Liver and kidney diseases, Rheumatic and immune diseases	#NULL!	Yes	Yes	#NULL!	Yes	No	agree or already took the COVID vaccin	already took COVID vaccine	already took COVID vaccine	already took COVID vaccine	P fizer
105	2022-09-15 16:55:42	Yes	1	NLI	Faiyum	Female	40-49 year	>=40 year	Mother	Mother	Preparatory educattion	low educated	Not employed	Not employed	Non Health	No	Enough and saving	Enough	No	4-5	4	4	No	Took the first dose and is awaiting the second	awaiting the second	No	No	No	No	No	No	No	17	Female	No	Liver and kidney diseases, Rheumatic and immune diseases	#NULL!	Yes	Yes	#NULL!	Yes	No	agree or already took the COVID vaccin	already took COVID vaccine	already took COVID vaccine	already took COVID vaccine	P fizer
117	2022-09-17 11:27:01	Yes	1	NLI	Sohag	Male	50-59 year	>=40 year	Father	Father	Preparatory educattion	low educated	Private	Full Time	Non Health	No	Not enough; on a loan but can pay back	Not Enough	Yes	>5	>5	6	Yes	Took the first dose and is awaiting the second	awaiting the second	Yes	No	Yes	No	No	Yes	HTN, physical disapplities	17	Female	Yes	Liver and kidney diseases, Rheumatic and immune diseases	#NULL!	Yes	Yes	#NULL!	Yes	No	agree or already took the COVID vaccin	already took COVID vaccine	already took COVID vaccine	already took COVID vaccine	P fizer
147	2022-09-23 20:08:13	Yes	1	NLI	Gharbia	Male	40-49 year	>=40 year	Father	Father	Preparatory educattion	low educated	Private	Full Time	Non Health	Private	Enough	Enough	Yes	>5	>5	6	Not Sure	Took the first and second doses and is awaiting the booster dose	N/A	No	No	No	No	No	No	No	17	Male	Not sure	Liver and kidney diseases, Rheumatic and immune diseases	#NULL!	Yes	Yes	#NULL!	Yes	No	agree or already took the COVID vaccin	already took COVID vaccine	already took COVID vaccine	already took COVID vaccine	P fizer
148	2022-09-23 20:10:43	Yes	1	NLI	Sharqia	Male	40-49 year	>=40 year	Father	Father	Primary educattion	low educated	Private	Full Time	Non Health	No	Enough	Enough	No	>5	>5	6	Yes	Took the first and second doses and is awaiting the booster dose	N/A	No	No	No	No	No	No	No	17	Female	No	Liver and kidney diseases, Rheumatic and immune diseases	#NULL!	Yes	Yes	#NULL!	Yes	No	agree or already took the COVID vaccin	already took COVID vaccine	already took COVID vaccine	already took COVID vaccine	P fizer
157	2022-09-26 19:29:20	Yes	1	NLI	Monufia	Female	40-49 year	>=40 year	Mother	Mother	Primary educattion	low educated	Not employed	Not employed	Non Health	No	Enough	Enough	Yes	>5	>5	6	No	Took the first and second doses and is awaiting the booster dose	N/A	No	No	No	No	No	No	No	12	Female	No	Liver and kidney diseases, Rheumatic and immune diseases	#NULL!	Yes	Yes	#NULL!	Yes	No	agree or already took the COVID vaccin	already took COVID vaccine	already took COVID vaccine	already took COVID vaccine	P fizer
162	2022-09-26 19:50:21	Yes	1	NLI	Gharbia	Male	40-49 year	>=40 year	Father	Father	Write and read	low educated	Government	Full Time	Non Health	Governmental	Enough	Enough	Yes	4-5	5	5	No	Took the first and second doses and is awaiting the booster dose	N/A	No	No	No	No	Yes	Yes	DM	17	Female	Not sure	Liver and kidney diseases, Rheumatic and immune diseases	#NULL!	Yes	Yes	#NULL!	Yes	No	agree or already took the COVID vaccin	already took COVID vaccine	already took COVID vaccine	already took COVID vaccine	P fizer
164	2022-09-26 20:20:42	Yes	1	NLI	Beheira	Female	40-49 year	>=40 year	Mother	Mother	Preparatory educattion	low educated	Not employed	Not employed	Non Health	No	Enough	Enough	No	4-5	5	5	No	Took the first and second doses and is awaiting the booster dose	N/A	No	No	No	No	No	No	No	17	Female	No	Liver and kidney diseases, Rheumatic and immune diseases	#NULL!	Yes	Yes	#NULL!	Yes	No	agree or already took the COVID vaccin	already took COVID vaccine	already took COVID vaccine	already took COVID vaccine	P fizer
167	2022-09-26 20:36:06	Yes	1	NLI	Kafr el-Sheikh	Female	50-59 year	>=40 year	Mother	Mother	Primary educattion	low educated	Not employed	Not employed	Non Health	No	Enough	Enough	No	4-5	5	5	Not Sure	Took the first dose and is awaiting the second	awaiting the second	Yes	No	No	No	No	Yes	HTN	17	Female	No	Liver and kidney diseases, Rheumatic and immune diseases	#NULL!	Yes	Yes	#NULL!	Yes	No	agree or already took the COVID vaccin	already took COVID vaccine	already took COVID vaccine	already took COVID vaccine	P fizer
19	2022-06-12 22:13:23	Yes	3	NLI	Monufia	Male	50-59 year	>=40 year	Father	Father	University education	Mediuem/high educated	Government	Full Time	Non Health	Governmental	Enough	Enough	No	4-5	5	5	Yes	Took the first and second doses and is awaiting the booster dose	N/A	No	No	No	No	No	No	No	17	Female	No	Rheumatic and immune diseases	#NULL!	Yes	#NULL!	#NULL!	Yes	No	agree or already took the COVID vaccin	already took COVID vaccine	already took COVID vaccine	already took COVID vaccine	P fizer
21	2022-06-13 12:43:01	Yes	3	NLI	Monufia	Female	40-49 year	>=40 year	Mother	Mother	High school	Mediuem/high educated	Not employed	Not employed	Non Health	No	Enough	Enough	No	>5	>5	6	No	Took the first dose but does not want to take the second dose	will not continu taking doses	No	No	No	No	No	No	No	15	Female	No	Rheumatic and immune diseases	#NULL!	Yes	#NULL!	#NULL!	Yes	No	agree or already took the COVID vaccin	already took COVID vaccine	already took COVID vaccine	already took COVID vaccine	P fizer
57	2022-08-05 13:15:30	Yes	1	NLI	Beheira	Male	40-49 year	>=40 year	Father	Father	High school	Mediuem/high educated	Government	Full Time	Non Health	Governmental	Enough and saving	Enough	No	4-5	5	5	Yes	Took the first and second doses and is awaiting the booster dose	N/A	No	No	No	No	No	No	No	17	Female	No	Liver and kidney diseases, Rheumatic and immune diseases	#NULL!	Yes	Yes	#NULL!	Yes	No	agree or already took the COVID vaccin	already took COVID vaccine	already took COVID vaccine	already took COVID vaccine	Moderna
90	2022-09-12 21:48:08	Yes	1	NLI	Monufia	Male	30-39 year	<40 year	Father	Father	University education	Mediuem/high educated	Government	Full Time	Non Health	Governmental	Enough and saving	Enough	No	4-5	4	4	No	Took the first and second doses and is awaiting the booster dose	N/A	No	No	No	No	No	No	No	16	Male	No	Liver and kidney diseases, Rheumatic and immune diseases	#NULL!	Yes	Yes	#NULL!	Yes	No	agree or already took the COVID vaccin	already took COVID vaccine	already took COVID vaccine	already took COVID vaccine	P fizer
102	2022-09-15 15:03:06	Yes	1	NLI	Ismailia	Female	40-49 year	>=40 year	Father	Father	High school	Mediuem/high educated	Government	Full Time	Non Health	Governmental	Enough	Enough	Yes	>5	>5	6	Yes	Took the first dose and is awaiting the second	awaiting the second	Yes	No	No	No	No	Yes	HTN	17	Female	Yes	Liver and kidney diseases, Rheumatic and immune diseases	#NULL!	Yes	Yes	#NULL!	Yes	No	agree or already took the COVID vaccin	already took COVID vaccine	already took COVID vaccine	already took COVID vaccine	P fizer
108	2022-09-16 15:56:29	Yes	1	NLI	Gharbia	Female	40-49 year	>=40 year	Mother	Mother	University education	Mediuem/high educated	Government	Full Time	Non Health	Governmental	Enough and saving	Enough	No	4-5	5	5	No	Took the first and second doses and is awaiting the booster dose	N/A	Yes	No	No	No	No	Yes	HTN	16	Female	Yes	Liver and kidney diseases, Rheumatic and immune diseases	#NULL!	Yes	Yes	#NULL!	Yes	No	agree or already took the COVID vaccin	already took COVID vaccine	already took COVID vaccine	already took COVID vaccine	P fizer
120	2022-09-17 11:45:21	Yes	1	NLI	Cairo	Female	40-49 year	>=40 year	Mother	Mother	High school	Mediuem/high educated	Not employed	Not employed	Non Health	No	Enough	Enough	No	4-5	5	5	Not Sure	Took the first dose and is awaiting the second	awaiting the second	No	No	No	No	No	No	No	16	Female	No	Liver and kidney diseases, Rheumatic and immune diseases	#NULL!	Yes	Yes	#NULL!	Yes	No	agree or already took the COVID vaccin	already took COVID vaccine	already took COVID vaccine	already took COVID vaccine	P fizer
129	2022-09-21 11:08:11	Yes	1	NLI	Beheira	Male	40-49 year	>=40 year	Father	Father	High school	Mediuem/high educated	Government	Full Time	Non Health	Governmental	Enough	Enough	No	4-5	5	5	No	Took the first and second doses and is awaiting the booster dose	N/A	No	No	No	No	No	No	No	17	Female	No	Liver and kidney diseases, Rheumatic and immune diseases	#NULL!	Yes	Yes	#NULL!	Yes	No	agree or already took the COVID vaccin	already took COVID vaccine	already took COVID vaccine	already took COVID vaccine	P fizer
150	2022-09-23 20:18:21	Yes	1	NLI	Gharbia	Female	18-29 year	<40 year	Others	Others	Postgraduate	Mediuem/high educated	Government	Full Time	Health	Governmental	Enough	Enough	Yes	>5	>5	6	Yes	Took the three doses	N/A	No	No	No	No	No	No	No	17	Male	No	Liver and kidney diseases, Rheumatic and immune diseases	#NULL!	Yes	Yes	#NULL!	Yes	No	agree or already took the COVID vaccin	already took COVID vaccine	already took COVID vaccine	already took COVID vaccine	P fizer
151	2022-09-23 20:21:13	Yes	1	NLI	Beheira	Male	40-49 year	>=40 year	Father	Father	High school	Mediuem/high educated	Government	Full Time	Non Health	Governmental	Enough	Enough	Yes	>5	>5	6	No	Took the three doses	N/A	Yes	No	No	No	No	Yes	HTN	17	Male	No	Liver and kidney diseases, Rheumatic and immune diseases	#NULL!	Yes	Yes	#NULL!	Yes	No	agree or already took the COVID vaccin	already took COVID vaccine	already took COVID vaccine	already took COVID vaccine	P fizer
152	2022-09-23 20:25:52	Yes	1	NLI	Sharqia	Male	30-39 year	<40 year	Others	Others	University education	Mediuem/high educated	Government	Full Time	Non Health	Governmental	Enough	Enough	Yes	>5	>5	6	Yes	Took the first and second doses and is awaiting the booster dose	N/A	No	No	No	No	No	No	No	17	Male	Yes	Liver and kidney diseases, Rheumatic and immune diseases	#NULL!	Yes	Yes	#NULL!	Yes	No	agree or already took the COVID vaccin	already took COVID vaccine	already took COVID vaccine	already took COVID vaccine	P fizer
169	2022-09-27 10:56:15	Yes	1	NLI	Sharqia	Male	40-49 year	>=40 year	Father	Father	University education	Mediuem/high educated	Government	Full Time	Non Health	Governmental	Enough	Enough	No	4-5	4	4	No	Took the three doses	N/A	No	No	No	No	No	No	No	17	Male	No	Liver and kidney diseases	#NULL!	#NULL!	Yes	#NULL!	Yes	No	agree or already took the COVID vaccin	already took COVID vaccine	already took COVID vaccine	already took COVID vaccine	P fizer
6	2022-05-18 23:23:45	Yes	1	NLI	Beheira	Female	50-59 year	>=40 year	Mother	Mother	University education	Mediuem/high educated	Government	Part time	Non Health	Governmental	Enough	Enough	No	4-5	5	5	Yes	Took the first and second doses and is awaiting the booster dose	N/A	Yes	No	No	No	No	Yes	HTN	17	Female	No	Liver and kidney diseases	#NULL!	#NULL!	Yes	#NULL!	Yes	No	agree or already took the COVID vaccin	already took COVID vaccine	already took COVID vaccine	already took COVID vaccine	P fizer
2	2022-05-16 16:31:06	Yes	1	NLI	Cairo	Female	50-59 year	>=40 year	Mother	Mother	Illiterate	Illiterate	Not employed	Not employed	Non Health	No	Enough	Enough	Yes	>5	>5	6	No	Wants to take the vaccine, but it is not scheduled yet	N/A	No	No	No	No	No	No	No	17	Female	No	Liver and kidney diseases	#NULL!	#NULL!	Yes	#NULL!	Yes	No	agree or already took the COVID vaccin	agree to take COVID vaccin	agree but after some time to know COVID vaccine side effect	Hesitant	Don't Know
9	2022-05-30 10:04:28	Yes	1	NLI	Monufia	Female	50-59 year	>=40 year	Mother	Mother	Illiterate	Illiterate	Not employed	Not employed	Non Health	No	Enough	Enough	No	2-3	2	2	No	Took the first and second doses but did not want to take the booster dose	will not continu taking doses	No	No	No	No	No	No	No	14	Female	No	Liver and kidney diseases	#NULL!	#NULL!	Yes	#NULL!	No	No	disagree to take COVID vaccine	disagree to take COVID vaccine	disagree to take COVID vaccine	Hesitant	Don't Know
26	2022-06-20 10:43:21	Yes	1	NLI	Monufia	Female	40-49 year	>=40 year	Mother	Mother	Illiterate	Illiterate	Not employed	Not employed	Non Health	No	Not enough; on a loan and cannot pay back	Not Enough	No	2-3	3	3	No	Took the first and second doses but did not want to take the booster dose	awaiting the second	No	No	No	No	No	No	No	14	Female	No	Liver and kidney diseases	#NULL!	#NULL!	Yes	#NULL!	Yes	No	disagree to take COVID vaccine	disagree to take COVID vaccine	disagree to take COVID vaccine	Hesitant	P fizer
47	2022-07-21 14:13:28	Yes	1	NLI	Kafr el-Sheikh	Male	more than 60 year	>=40 year	Father	Father	Illiterate	Illiterate	Private	Full Time	Non Health	No	Enough	Enough	No	>5	>5	6	No	Does not want to take the vaccine	N/A	Yes	No	No	No	No	Yes	HTN	17	Male	No	Liver and kidney diseases	#NULL!	#NULL!	Yes	#NULL!	Yes	No	disagree to take COVID vaccine	disagree to take COVID vaccine	disagree to take COVID vaccine	Hesitant	Disagree to Vaccinate
58	2022-08-09 18:25:57	Yes	1	NLI	Beheira	Female	30-39 year	<40 year	Mother	Mother	Illiterate	Illiterate	Not employed	Not employed	Non Health	No	Not enough; on a loan but can pay back	Not Enough	Yes	>5	>5	6	No	Took the first and second doses and is awaiting the booster dose	awaiting the second	No	No	No	No	No	No	No	13	Male	No	Liver and kidney diseases, Rheumatic and immune diseases	#NULL!	Yes	Yes	#NULL!	Yes	No	agree or already took the COVID vaccin	agree to take COVID vaccin	agree but after some time to know COVID vaccine side effect	Hesitant	Don't Know
70	2022-08-18 22:15:28	Yes	1	NLI	Kafr el-Sheikh	Female	40-49 year	>=40 year	Mother	Mother	Illiterate	Illiterate	Not employed	Not employed	Non Health	No	Not enough; on a loan but can pay back	Not Enough	No	2-3	2	2	Yes	Took the first and second doses and is awaiting the booster dose	N/A	No	No	No	No	No	No	No	16	Female	No	Liver and kidney diseases, Rheumatic and immune diseases	#NULL!	Yes	Yes	#NULL!	Yes	No	agree or already took the COVID vaccin	agree to take COVID vaccin	agree but after some time to know COVID vaccine side effect	Hesitant	Don't Know
71	2022-08-18 22:19:00	Yes	1	NLI	Beheira	Female	40-49 year	>=40 year	Mother	Mother	Illiterate	Illiterate	Not employed	Not employed	Non Health	No	Enough	Enough	Yes	>5	>5	6	Yes	Took the first and second doses and is awaiting the booster dose	N/A	No	No	No	No	No	No	No	12	Female	No	Liver and kidney diseases, Rheumatic and immune diseases	#NULL!	Yes	Yes	#NULL!	Yes	No	disagree to take COVID vaccine	disagree to take COVID vaccine	disagree to take COVID vaccine	Hesitant	Disagree to Vaccinate
77	2022-08-31 11:56:46	Yes	1	NLI	Qalyubia	Female	30-39 year	<40 year	Mother	Mother	Illiterate	Illiterate	Not employed	Not employed	Non Health	No	Enough	Enough	No	4-5	5	5	No	Does not want to take the vaccine	N/A	No	No	No	No	No	No	No	10	Female	No	Liver and kidney diseases	#NULL!	#NULL!	Yes	#NULL!	Yes	No	disagree to take COVID vaccine	disagree to take COVID vaccine	disagree to take COVID vaccine	Hesitant	Disagree to Vaccinate
85	2022-09-05 17:16:00	Yes	1	NLI	Monufia	Female	30-39 year	<40 year	Mother	Mother	Illiterate	Illiterate	Not employed	Not employed	Non Health	No	Enough	Enough	Yes	>5	>5	6	No	Took the first and second doses and is awaiting the booster dose	N/A	No	No	No	No	No	No	No	12	Female	No	Liver and kidney diseases, Rheumatic and immune diseases	#NULL!	Yes	Yes	#NULL!	Yes	No	agree or already took the COVID vaccin	agree to take COVID vaccin	agree but after 12 years old	Hesitant	Don't Know
86	2022-09-05 17:20:59	Yes	1	NLI	Beheira	Female	30-39 year	<40 year	Mother	Mother	Illiterate	Illiterate	Not employed	Not employed	Non Health	No	Enough	Enough	No	4-5	5	5	No	Took the first and second doses and is awaiting the booster dose	N/A	No	No	No	No	No	No	No	9	Female	No	Liver and kidney diseases, Rheumatic and immune diseases	#NULL!	Yes	Yes	#NULL!	Yes	No	agree or already took the COVID vaccin	agree to take COVID vaccin	agree but after 12 years old	Hesitant	Don't Know
109	2022-09-16 15:59:40	Yes	1	NLI	Sharqia	Female	40-49 year	>=40 year	Mother	Mother	Illiterate	Illiterate	Not employed	Not employed	Non Health	No	Not enough; on a loan but can pay back	Not Enough	Yes	>5	>5	6	Yes	Does not want to take the vaccine	N/A	No	No	No	No	No	No	No	14	Male	No	Liver and kidney diseases, Rheumatic and immune diseases	#NULL!	Yes	Yes	#NULL!	Yes	No	disagree to take COVID vaccine	disagree to take COVID vaccine	disagree to take COVID vaccine	Hesitant	Disagree to Vaccinate
114	2022-09-17 11:11:21	Yes	1	NLI	Monufia	Female	50-59 year	>=40 year	Mother	Mother	Illiterate	Illiterate	Not employed	Not employed	Non Health	No	Not enough; on a loan but can pay back	Not Enough	No	>5	>5	6	No	Does not want to take the vaccine	N/A	No	No	No	No	No	No	No	14	Male	No	Liver and kidney diseases, Rheumatic and immune diseases	#NULL!	Yes	Yes	#NULL!	Yes	No	disagree to take COVID vaccine	disagree to take COVID vaccine	disagree to take COVID vaccine	Hesitant	Disagree to Vaccinate
116	2022-09-17 11:23:05	Yes	1	NLI	Monufia	Female	40-49 year	>=40 year	Mother	Mother	Illiterate	Illiterate	Not employed	Not employed	Non Health	No	Not enough; on a loan but can pay back	Not Enough	Yes	>5	>5	6	No	Does not want to take the vaccine	N/A	No	No	No	No	No	No	No	13	Male	No	Liver and kidney diseases, Rheumatic and immune diseases	#NULL!	Yes	Yes	#NULL!	Yes	No	disagree to take COVID vaccine	disagree to take COVID vaccine	disagree to take COVID vaccine	Hesitant	Disagree to Vaccinate
118	2022-09-17 11:30:50	Yes	1	NLI	Alexandria	Female	40-49 year	>=40 year	Mother	Mother	Illiterate	Illiterate	Not employed	Not employed	Non Health	No	Enough	Enough	Yes	>5	>5	6	Not Sure	Does not want to take the vaccine	N/A	No	No	No	No	No	No	No	17	Female	Not sure	Liver and kidney diseases, Rheumatic and immune diseases	#NULL!	Yes	Yes	#NULL!	Yes	No	agree or already took the COVID vaccin	agree to take COVID vaccin	agree but after some time to know COVID vaccine side effect	Hesitant	Don't Know
123	2022-09-17 11:55:41	Yes	1	NLI	Matruh	Female	40-49 year	>=40 year	Mother	Mother	Illiterate	Illiterate	Not employed	Not employed	Non Health	No	Enough	Enough	No	4-5	5	5	No	Does not want to take the vaccine	N/A	No	No	No	No	No	No	No	17	Female	No	Liver and kidney diseases, Rheumatic and immune diseases, Chest diseases	#NULL!	Yes	Yes	Yes	Yes	No	disagree to take COVID vaccine	disagree to take COVID vaccine	disagree to take COVID vaccine	Hesitant	Disagree to Vaccinate
132	2022-09-21 11:25:07	Yes	1	NLI	Kafr el-Sheikh	Female	30-39 year	<40 year	Mother	Mother	Illiterate	Illiterate	Not employed	Not employed	Non Health	No	Enough	Enough	No	>5	>5	6	No	Does not want to take the vaccine	N/A	No	No	No	No	No	No	No	15	Female	No	Liver and kidney diseases, Rheumatic and immune diseases	#NULL!	Yes	Yes	#NULL!	Yes	No	disagree to take COVID vaccine	disagree to take COVID vaccine	disagree to take COVID vaccine	Hesitant	Disagree to Vaccinate
133	2022-09-21 11:34:01	Yes	1	NLI	Monufia	Female	30-39 year	<40 year	Mother	Mother	Illiterate	Illiterate	Not employed	Not employed	Non Health	No	Enough	Enough	Yes	4-5	5	5	No	Does not want to take the vaccine	N/A	No	No	No	No	No	No	No	6	Female	No	Liver and kidney diseases, Rheumatic and immune diseases	#NULL!	Yes	Yes	#NULL!	Yes	No	agree or already took the COVID vaccin	agree to take COVID vaccin	agree but after 12 years old	Hesitant	P fizer or Moderna
135	2022-09-21 11:49:15	Yes	1	NLI	Kafr el-Sheikh	Female	40-49 year	>=40 year	Mother	Mother	Illiterate	Illiterate	Not employed	Not employed	Non Health	No	Enough	Enough	Yes	>5	>5	6	Yes	Took the three doses	N/A	No	No	No	No	No	No	No	10	Male	No	Liver and kidney diseases, Rheumatic and immune diseases	#NULL!	Yes	Yes	#NULL!	Yes	No	disagree to take COVID vaccine	disagree to take COVID vaccine	disagree to take COVID vaccine	Hesitant	Disagree to Vaccinate
142	2022-09-23 11:16:11	Yes	1	NLI	Beheira	Female	30-39 year	<40 year	Mother	Mother	Illiterate	Illiterate	Not employed	Not employed	Non Health	No	Enough	Enough	No	4-5	4	4	No	Took the first and second doses and is awaiting the booster dose	N/A	No	No	No	No	No	No	No	10	Male	No	Liver and kidney diseases, Rheumatic and immune diseases	#NULL!	Yes	Yes	#NULL!	Yes	No	agree or already took the COVID vaccin	agree to take COVID vaccin	agree but after 12 years old	Hesitant	Don't Know
155	2022-09-26 19:21:29	Yes	1	NLI	Qalyubia	Male	40-49 year	>=40 year	Father	Father	Illiterate	Illiterate	Private	Full Time	Non Health	No	Not enough; on a loan but can pay back	Not Enough	No	>5	>5	6	No	Does not want to take the vaccine	N/A	No	No	No	No	No	No	No	16	Female	No	Liver and kidney diseases, Rheumatic and immune diseases	#NULL!	Yes	Yes	#NULL!	Yes	No	disagree to take COVID vaccine	disagree to take COVID vaccine	disagree to take COVID vaccine	Hesitant	Disagree to Vaccinate
158	2022-09-26 19:34:01	Yes	1	NLI	Qalyubia	Female	30-39 year	<40 year	Mother	Mother	Illiterate	Illiterate	Not employed	Not employed	Non Health	No	Enough	Enough	No	4-5	5	5	No	Does not want to take the vaccine	N/A	No	Yes	No	Yes	No	Yes	Rheumatic and immune diseases& kidney and liver diseases	10	Female	No	Liver and kidney diseases, Rheumatic and immune diseases	#NULL!	Yes	Yes	#NULL!	Yes	No	agree or already took the COVID vaccin	agree to take COVID vaccin	agree but after 12 years old	Hesitant	Don't Know
160	2022-09-26 19:41:55	Yes	1	NLI	Monufia	Female	30-39 year	<40 year	Mother	Mother	Illiterate	Illiterate	Not employed	Not employed	Non Health	No	Enough	Enough	Yes	>5	>5	6	Yes	Does not want to take the vaccine	N/A	No	No	No	No	No	No	No	5	Female	No	Liver and kidney diseases, Rheumatic and immune diseases	#NULL!	Yes	Yes	#NULL!	Yes	No	disagree to take COVID vaccine	disagree to take COVID vaccine	disagree to take COVID vaccine	Hesitant	Disagree to Vaccinate
163	2022-09-26 20:18:23	Yes	1	NLI	Monufia	Female	40-49 year	>=40 year	Mother	Mother	Illiterate	Illiterate	Not employed	Not employed	Non Health	No	Not enough; on a loan but can pay back	Not Enough	No	4-5	4	4	No	Does not want to take the vaccine	N/A	No	No	No	No	No	No	No	11	Female	No	Liver and kidney diseases, Rheumatic and immune diseases	#NULL!	Yes	Yes	#NULL!	Yes	No	disagree to take COVID vaccine	disagree to take COVID vaccine	disagree to take COVID vaccine	Hesitant	Disagree to Vaccinate
12	2022-05-30 10:54:06	Yes	1	NLI	Gharbia	Female	30-39 year	<40 year	Mother	Mother	Preparatory educattion	low educated	Not employed	Not employed	Non Health	No	Enough	Enough	Yes	>5	>5	6	No	Took the three doses	N/A	No	No	No	No	No	Yes	Others	14	Female	No	Liver and kidney diseases	#NULL!	#NULL!	Yes	#NULL!	Yes	No	agree or already took the COVID vaccin	agree to take COVID vaccin	agree but after some time to know COVID vaccine side effect	Hesitant	Don't Know
15	2022-05-30 11:42:49	Yes	2	NLI	Kafr el-Sheikh	Male	40-49 year	>=40 year	Mother	Mother	Preparatory educattion	low educated	Private	Full Time	Non Health	No	Not enough; on a loan and cannot pay back	Not Enough	No	4-5	4	4	No	Does not want to take the vaccine	N/A	No	No	No	No	No	Yes	Others	14	Male	No	Others	Yes	#NULL!	#NULL!	#NULL!	No	No	disagree to take COVID vaccine	disagree to take COVID vaccine	disagree to take COVID vaccine	Hesitant	Don't Know
17	2022-06-06 14:29:50	Yes	2	NLI	Monufia	Female	40-49 year	>=40 year	Mother	Mother	Write and read	low educated	Not employed	Not employed	Non Health	No	Enough	Enough	No	4-5	5	5	No	Took the first and second doses and is awaiting the booster dose	awaiting the second	No	No	No	No	No	No	No	16	Male	No	Liver and kidney diseases, Rheumatic and immune diseases	#NULL!	Yes	Yes	#NULL!	Yes	No	agree or already took the COVID vaccin	agree to take COVID vaccin	agree but after some time to know COVID vaccine side effect	Hesitant	Don't Know
22	2022-06-13 12:52:37	Yes	1	NLI	Beheira	Female	18-29 year	<40 year	Mother	Mother	Preparatory educattion	low educated	Not employed	Not employed	Non Health	No	Enough	Enough	No	4-5	5	5	No	Does not want to take the vaccine	will not continu taking doses	No	No	No	No	No	No	No	12	Female	No	Rheumatic and immune diseases	#NULL!	Yes	#NULL!	#NULL!	Yes	No	disagree to take COVID vaccine	disagree to take COVID vaccine	disagree to take COVID vaccine	Hesitant	Disagree to Vaccinate
24	2022-06-14 13:44:19	Yes	1	NLI	Kafr el-Sheikh	Female	40-49 year	>=40 year	Mother	Mother	Preparatory educattion	low educated	Not employed	Not employed	Non Health	No	Enough	Enough	No	>5	>5	6	No	Took the first dose but does not want to take the second dose	will not continu taking doses	No	No	No	No	No	No	No	14	Female	No	Rheumatic and immune diseases	#NULL!	Yes	#NULL!	#NULL!	Yes	No	agree or already took the COVID vaccin	agree to take COVID vaccin	agree but after some time to know COVID vaccine side effect	Hesitant	P fizer
33	2022-06-26 17:41:26	Yes	1	NLI	Monufia	Female	30-39 year	<40 year	Mother	Mother	Preparatory educattion	low educated	Not employed	Not employed	Non Health	No	Enough	Enough	No	4-5	4	4	No	Took the first dose but does not want to take the second dose	will not continu taking doses	No	No	No	No	No	No	No	9	Female	No	Liver and kidney diseases	#NULL!	#NULL!	Yes	#NULL!	Yes	No	agree or already took the COVID vaccin	agree to take COVID vaccin	agree but after some time to know COVID vaccine side effect	Hesitant	Don't Know
35	2022-06-27 13:01:25	Yes	1	NLI	Gharbia	Female	30-39 year	<40 year	Mother	Mother	Write and read	low educated	Not employed	Not employed	Non Health	No	Enough	Enough	No	>5	>5	6	No	Does not want to take the vaccine	Lactating	No	No	No	No	No	No	No	12	Male	No	Rheumatic and immune diseases	#NULL!	Yes	#NULL!	#NULL!	Yes	No	agree or already took the COVID vaccin	agree to take COVID vaccin	agree but after 12 years old	Hesitant	Don't Know
36	2022-06-30 11:39:42	Yes	1	NLI	Alexandria	Male	40-49 year	>=40 year	Mother	Mother	Preparatory educattion	low educated	Not employed	Not employed	Non Health	No	Enough	Enough	Yes	4-5	4	4	No	Took the first and second doses and is awaiting the booster dose	N/A	No	No	No	No	No	No	No	16	Male	No	Liver and kidney diseases	#NULL!	#NULL!	Yes	#NULL!	Yes	No	agree or already took the COVID vaccin	agree to take COVID vaccin	agree but after some time to know COVID vaccine side effect	Hesitant	Moderna
50	2022-08-01 10:08:02	Yes	1	NLI	Monufia	Male	40-49 year	>=40 year	Father	Father	Preparatory educattion	low educated	Government	Full Time	Non Health	Governmental	Enough	Enough	No	4-5	5	5	No	Took the first and second doses and is awaiting the booster dose	N/A	No	No	No	No	No	No	No	10	Male	No	Rheumatic and immune diseases	#NULL!	Yes	#NULL!	#NULL!	Yes	No	agree or already took the COVID vaccin	agree to take COVID vaccin	agree but after some time to know COVID vaccine side effect	Hesitant	P fizer or Moderna
52	2022-08-01 10:19:21	Yes	1	NLI	Monufia	Female	30-39 year	<40 year	Mother	Mother	Preparatory educattion	low educated	Not employed	Not employed	Non Health	No	Enough	Enough	No	4-5	4	4	No	Took the first and second doses and is awaiting the booster dose	N/A	No	No	No	No	No	No	No	10	Female	No	Liver and kidney diseases	#NULL!	#NULL!	Yes	#NULL!	Yes	No	agree or already took the COVID vaccin	agree to take COVID vaccin	agree but after 12 years old	Hesitant	Don't Know
59	2022-08-09 18:32:48	Yes	3	NLI	Sharqia	Male	30-39 year	<40 year	Uncle/Unte	Others	Preparatory educattion	low educated	Government	Full Time	Non Health	No	Not enough; on a loan but can pay back	Not Enough	No	4-5	4	4	No	Took the three doses	N/A	No	No	No	No	No	No	No	9	Female	No	Liver and kidney diseases, Rheumatic and immune diseases	#NULL!	Yes	Yes	#NULL!	Yes	No	agree or already took the COVID vaccin	agree to take COVID vaccin	agree but after some time to know COVID vaccine side effect	Hesitant	Don't Know
60	2022-08-09 18:36:24	Yes	1	NLI	Kafr el-Sheikh	Female	40-49 year	>=40 year	Mother	Mother	Preparatory educattion	low educated	Not employed	Not employed	Non Health	No	Enough	Enough	No	4-5	4	4	No	Does not want to take the vaccine	N/A	No	No	No	No	No	No	No	15	Female	No	Liver and kidney diseases, Rheumatic and immune diseases	#NULL!	Yes	Yes	#NULL!	Yes	No	disagree to take COVID vaccine	disagree to take COVID vaccine	disagree to take COVID vaccine	Hesitant	Don't Know
65	2022-08-18 21:53:49	Yes	1	NLI	Monufia	Female	30-39 year	<40 year	Mother	Mother	Primary educattion	low educated	Not employed	Not employed	Non Health	No	Enough	Enough	No	4-5	4	4	No	Took the first and second doses and is awaiting the booster dose	N/A	No	No	No	No	No	No	No	11	Female	No	Liver and kidney diseases	#NULL!	#NULL!	Yes	#NULL!	Yes	No	agree or already took the COVID vaccin	agree to take COVID vaccin	agree but after 12 years old	Hesitant	Don't Know
69	2022-08-18 22:11:53	Yes	1	NLI	Gharbia	Female	40-49 year	>=40 year	Mother	Mother	Preparatory educattion	low educated	Not employed	Not employed	Non Health	No	Enough	Enough	No	4-5	4	4	No	Took the first and second doses and is awaiting the booster dose	N/A	No	No	No	No	No	No	No	14	Female	No	Liver and kidney diseases, Rheumatic and immune diseases	#NULL!	Yes	Yes	#NULL!	Yes	No	agree or already took the COVID vaccin	agree to take COVID vaccin	agree but after some time to know COVID vaccine side effect	Hesitant	Don't Know
74	2022-08-23 18:36:11	Yes	1	NLI	Monufia	Male	30-39 year	<40 year	Father	Father	Write and read	low educated	Private	Full Time	Non Health	No	Enough	Enough	Yes	>5	>5	6	No	Took the first and second doses and is awaiting the booster dose	N/A	No	No	No	No	No	No	No	6	Female	No	Liver and kidney diseases, Rheumatic and immune diseases	#NULL!	Yes	Yes	#NULL!	No	No	agree or already took the COVID vaccin	agree to take COVID vaccin	agree but after 12 years old	Hesitant	Don't Know
79	2022-08-31 12:02:46	Yes	1	NLI	Beheira	Male	40-49 year	>=40 year	Father	Father	Primary educattion	low educated	Government	Full Time	Non Health	Governmental	Enough	Enough	Yes	>5	>5	6	No	Took the first and second doses and is awaiting the booster dose	N/A	No	No	No	No	No	No	No	12	Female	No	Liver and kidney diseases	#NULL!	#NULL!	Yes	#NULL!	Yes	No	agree or already took the COVID vaccin	agree to take COVID vaccin	agree but after some time to know COVID vaccine side effect	Hesitant	P fizer or Moderna
81	2022-09-02 18:50:20	Yes	1	NLI	Monufia	Female	18-29 year	<40 year	Mother	Mother	Preparatory educattion	low educated	Not employed	Not employed	Non Health	No	Enough	Enough	No	4-5	5	5	No	Took the three doses	N/A	No	No	No	No	No	No	No	7	Male	No	Liver and kidney diseases	#NULL!	#NULL!	Yes	#NULL!	Yes	No	agree or already took the COVID vaccin	agree to take COVID vaccin	agree but after some time to know COVID vaccine side effect	Hesitant	Don't Know
82	2022-09-02 18:54:26	Yes	1	NLI	Matruh	Female	50-59 year	>=40 year	Mother	Mother	Preparatory educattion	low educated	Government	Full Time	Non Health	Governmental	Enough	Enough	Yes	>5	>5	6	No	Took the first and second doses and is awaiting the booster dose	N/A	No	No	No	No	No	No	No	11	Female	No	Liver and kidney diseases, Rheumatic and immune diseases	#NULL!	Yes	Yes	#NULL!	Yes	No	agree or already took the COVID vaccin	agree to take COVID vaccin	agree but after 12 years old	Hesitant	Don't Know
83	2022-09-02 18:57:04	Yes	1	NLI	Qalyubia	Female	40-49 year	>=40 year	Mother	Mother	Preparatory educattion	low educated	Not employed	Not employed	Non Health	No	Enough	Enough	Yes	>5	>5	6	No	Took the first and second doses but did not want to take the booster dose	N/A	No	No	No	No	No	No	No	11	Female	No	Liver and kidney diseases, Rheumatic and immune diseases	#NULL!	Yes	Yes	#NULL!	Yes	No	agree or already took the COVID vaccin	agree to take COVID vaccin	agree but after 12 years old	Hesitant	Don't Know
84	2022-09-05 17:11:12	Yes	1	NLI	Monufia	Female	40-49 year	>=40 year	Mother	Mother	Preparatory educattion	low educated	Not employed	Not employed	Non Health	No	Enough	Enough	No	4-5	5	5	No	Took the first and second doses and is awaiting the booster dose	N/A	No	No	No	No	No	No	No	16	Female	No	Liver and kidney diseases, Rheumatic and immune diseases	#NULL!	Yes	Yes	#NULL!	Yes	No	agree or already took the COVID vaccin	agree to take COVID vaccin	agree but after some time to know COVID vaccine side effect	Hesitant	P fizer or Moderna
93	2022-09-14 10:59:39	Yes	1	NLI	Kafr el-Sheikh	Female	30-39 year	<40 year	Mother	Mother	Preparatory educattion	low educated	Not employed	Not employed	Non Health	No	Enough	Enough	Yes	>5	>5	6	No	Took the first and second doses and is awaiting the booster dose	N/A	No	No	No	No	No	No	No	5	Male	No	Liver and kidney diseases	#NULL!	#NULL!	Yes	#NULL!	Yes	No	agree or already took the COVID vaccin	agree to take COVID vaccin	agree but after 12 years old	Hesitant	Don't Know
94	2022-09-14 11:37:59	Yes	1	NLI	Beheira	Male	30-39 year	<40 year	Father	Father	Preparatory educattion	low educated	Private	Full Time	Non Health	No	Enough	Enough	Yes	>5	>5	6	Yes	Took the first and second doses and is awaiting the booster dose	N/A	No	No	No	No	No	No	No	12	Male	No	Liver and kidney diseases	#NULL!	#NULL!	Yes	#NULL!	Yes	No	agree or already took the COVID vaccin	agree to take COVID vaccin	agree but after some time to know COVID vaccine side effect	Hesitant	Don't Know
103	2022-09-15 16:49:33	Yes	1	NLI	Monufia	Male	more than 60 year	>=40 year	Father	Father	Preparatory educattion	low educated	Government	Full Time	Health	Governmental	Enough	Enough	No	>5	>5	6	Yes	Took the first and second doses and is awaiting the booster dose	N/A	No	No	No	No	No	No	No	13	Female	No	Liver and kidney diseases, Rheumatic and immune diseases	#NULL!	Yes	Yes	#NULL!	Yes	No	agree or already took the COVID vaccin	agree to take COVID vaccin	agree but after some time to know COVID vaccine side effect	Hesitant	P fizer
104	2022-09-15 16:53:06	Yes	1	NLI	Faiyum	Female	50-59 year	>=40 year	Mother	Mother	Primary educattion	low educated	Not employed	Not employed	Non Health	No	Enough and saving	Enough	No	>5	>5	6	Not Sure	Does not want to take the vaccine	N/A	No	No	No	No	No	No	No	14	Female	No	Liver and kidney diseases, Rheumatic and immune diseases	#NULL!	Yes	Yes	#NULL!	Yes	No	disagree to take COVID vaccine	disagree to take COVID vaccine	disagree to take COVID vaccine	Hesitant	Disagree to Vaccinate
107	2022-09-16 15:53:52	Yes	1	NLI	Beheira	Male	50-59 year	>=40 year	Father	Father	Write and read	low educated	Not employed	Not employed	Non Health	No	Enough	Enough	Yes	>5	>5	6	Yes	Does not want to take the vaccine	N/A	No	No	No	No	No	No	No	17	Female	No	Liver and kidney diseases, Rheumatic and immune diseases	#NULL!	Yes	Yes	#NULL!	Yes	No	disagree to take COVID vaccine	disagree to take COVID vaccine	disagree to take COVID vaccine	Hesitant	Disagree to Vaccinate
111	2022-09-17 11:01:37	Yes	1	NLI	Kafr el-Sheikh	Female	30-39 year	<40 year	Mother	Mother	Primary educattion	low educated	Not employed	Not employed	Non Health	No	Enough	Enough	No	4-5	5	5	No	Took the first dose and is awaiting the second	awaiting the second	No	No	No	No	No	No	No	11	Female	No	Liver and kidney diseases, Rheumatic and immune diseases	#NULL!	Yes	Yes	#NULL!	Yes	No	agree or already took the COVID vaccin	agree to take COVID vaccin	agree but after 12 years old	Hesitant	P fizer or Moderna
112	2022-09-17 11:04:41	Yes	1	NLI	Gharbia	Female	30-39 year	<40 year	Mother	Mother	Preparatory educattion	low educated	Not employed	Not employed	Non Health	No	Enough and saving	Enough	No	4-5	5	5	No	Took the first dose but does not want to take the second dose	awaiting the second	No	No	No	No	No	No	No	13	Female	No	Liver and kidney diseases, Rheumatic and immune diseases	#NULL!	Yes	Yes	#NULL!	Yes	No	disagree to take COVID vaccine	disagree to take COVID vaccine	disagree to take COVID vaccine	Hesitant	Disagree to Vaccinate
113	2022-09-17 11:07:52	Yes	1	NLI	Gharbia	Female	40-49 year	>=40 year	Mother	Mother	Write and read	low educated	Not employed	Not employed	Non Health	No	Enough	Enough	No	>5	>5	6	Yes	Took the first dose and is awaiting the second	awaiting the second	No	No	No	No	No	No	No	17	Female	No	Liver and kidney diseases, Rheumatic and immune diseases	#NULL!	Yes	Yes	#NULL!	Yes	No	agree or already took the COVID vaccin	agree to take COVID vaccin	agree but after some time to know COVID vaccine side effect	Hesitant	P fizer
119	2022-09-17 11:33:54	Yes	1	NLI	Alexandria	Male	50-59 year	>=40 year	Father	Father	Preparatory educattion	low educated	Private	Full Time	Non Health	No	Not enough; on a loan but can pay back	Not Enough	Yes	>5	>5	6	Yes	Wants to take the vaccine, but it is not scheduled yet	N/A	No	No	No	No	No	No	No	17	Female	Yes	Liver and kidney diseases, Rheumatic and immune diseases	#NULL!	Yes	Yes	#NULL!	Yes	No	disagree to take COVID vaccine	disagree to take COVID vaccine	disagree to take COVID vaccine	Hesitant	Disagree to Vaccinate
124	2022-09-17 11:59:42	Yes	1	NLI	Beni Suef	Male	50-59 year	>=40 year	Father	Father	Preparatory educattion	low educated	Government	Full Time	Non Health	No	Enough	Enough	No	4-5	5	5	No	Took the first and second doses and is awaiting the booster dose	N/A	No	No	No	No	No	No	No	14	Male	No	Liver and kidney diseases, Rheumatic and immune diseases	#NULL!	Yes	Yes	#NULL!	Yes	No	agree or already took the COVID vaccin	agree to take COVID vaccin	agree but after some time to know COVID vaccine side effect	Hesitant	P fizer
136	2022-09-22 20:38:25	Yes	1	NLI	Damietta	Female	18-29 year	<40 year	Mother	Mother	Preparatory educattion	low educated	Not employed	Not employed	Non Health	No	Enough	Enough	No	4-5	5	5	No	Took the first and second doses and is awaiting the booster dose	N/A	No	No	No	No	No	No	No	9	Female	No	Liver and kidney diseases, Rheumatic and immune diseases	#NULL!	Yes	Yes	#NULL!	Yes	No	agree or already took the COVID vaccin	agree to take COVID vaccin	agree but after 12 years old	Hesitant	P fizer or Moderna
143	2022-09-23 11:19:29	Yes	1	NLI	Damietta	Female	30-39 year	<40 year	Mother	Mother	Write and read	low educated	Not employed	Not employed	Non Health	No	Enough	Enough	No	4-5	5	5	No	Does not want to take the vaccine	N/A	No	No	No	No	No	No	No	10	Female	No	Liver and kidney diseases, Rheumatic and immune diseases	#NULL!	Yes	Yes	#NULL!	Yes	No	disagree to take COVID vaccine	disagree to take COVID vaccine	disagree to take COVID vaccine	Hesitant	Disagree to Vaccinate
146	2022-09-23 20:02:39	Yes	1	NLI	Sharqia	Male	40-49 year	>=40 year	Father	Father	Preparatory educattion	low educated	Government	Full Time	Non Health	Governmental	Enough	Enough	No	4-5	5	5	Not Sure	Took the three doses	N/A	No	No	No	No	No	No	No	17	Male	No	Liver and kidney diseases, Rheumatic and immune diseases	#NULL!	Yes	Yes	#NULL!	Yes	No	disagree to take COVID vaccine	disagree to take COVID vaccine	disagree to take COVID vaccine	Hesitant	Disagree to Vaccinate
154	2022-09-23 20:35:36	Yes	1	NLI	Beni Suef	Female	40-49 year	>=40 year	Mother	Mother	Primary educattion	low educated	Not employed	Not employed	Non Health	No	Enough	Enough	Yes	>5	>5	6	Yes	Took the first dose and is awaiting the second	awaiting the second	Yes	No	No	No	No	Yes	HTN	17	Female	No	Liver and kidney diseases, Rheumatic and immune diseases	#NULL!	Yes	Yes	#NULL!	Yes	No	disagree to take COVID vaccine	disagree to take COVID vaccine	disagree to take COVID vaccine	Hesitant	Disagree to Vaccinate
156	2022-09-26 19:25:22	Yes	1	NLI	Monufia	Male	30-39 year	<40 year	Father	Father	Write and read	low educated	Private	Full Time	Non Health	No	Not enough; on a loan but can pay back	Not Enough	No	4-5	5	5	No	Does not want to take the vaccine	N/A	No	Yes	No	Yes	No	Yes	Rheumatic and immune diseases& kidney and liver diseases	12	Male	No	Liver and kidney diseases, Rheumatic and immune diseases	#NULL!	Yes	Yes	#NULL!	Yes	No	disagree to take COVID vaccine	disagree to take COVID vaccine	disagree to take COVID vaccine	Hesitant	Disagree to Vaccinate
161	2022-09-26 19:46:11	Yes	1	NLI	Beheira	Female	40-49 year	>=40 year	Mother	Mother	Primary educattion	low educated	Not employed	Not employed	Non Health	No	Enough	Enough	No	4-5	5	5	No	Does not want to take the vaccine	N/A	No	Yes	No	Yes	No	Yes	Rheumatic and immune diseases& kidney and liver diseases	17	Female	No	Liver and kidney diseases, Rheumatic and immune diseases	#NULL!	Yes	Yes	#NULL!	Yes	No	disagree to take COVID vaccine	disagree to take COVID vaccine	disagree to take COVID vaccine	Hesitant	Disagree to Vaccinate
170	2022-09-27 12:52:58	Yes	1	NLI	Gharbia	Female	30-39 year	<40 year	Mother	Mother	Write and read	low educated	Not employed	Not employed	Non Health	No	Enough	Enough	Yes	>5	>5	6	Yes	Does not want to take the vaccine	N/A	No	No	No	No	No	No	No	11	Male	No	Liver and kidney diseases	#NULL!	#NULL!	Yes	#NULL!	Yes	No	agree or already took the COVID vaccin	agree to take COVID vaccin	agree but after some time to know COVID vaccine side effect	Hesitant	Don't Know
172	2022-09-27 18:09:21	Yes	1	NLI	Sharqia	Female	40-49 year	>=40 year	Mother	Mother	Primary educattion	low educated	Not employed	Not employed	Non Health	No	Enough	Enough	No	4-5	5	5	No	Took the first and second doses and is awaiting the booster dose	N/A	No	No	No	No	No	No	No	11	Female	No	Liver and kidney diseases, Rheumatic and immune diseases	#NULL!	Yes	Yes	#NULL!	Yes	No	agree or already took the COVID vaccin	agree to take COVID vaccin	agree but after 12 years old	Hesitant	P fizer or Moderna
4	2022-05-18 13:44:54	Yes	1	NLI	Monufia	Female	50-59 year	>=40 year	Mother	Mother	Preparatory educattion	low educated	Not employed	Not employed	Non Health	No	Not enough; on a loan but can pay back	Not Enough	Yes	>5	>5	6	Yes	Does not want to take the vaccine	N/A	No	Yes	No	No	No	Yes	Rheumatic and immune diseases	17	Female	Yes	Liver and kidney diseases	#NULL!	#NULL!	Yes	#NULL!	Yes	No	agree or already took the COVID vaccin	agree to take COVID vaccin	agree but after some time to know COVID vaccine side effect	Hesitant	P fizer
1	2022-05-16 13:55:16	Yes	1	NLI	Minya	Female	30-39 year	<40 year	Mother	Mother	High school	Mediuem/high educated	Not employed	Not employed	Non Health	No	Enough	Enough	No	4-5	4	4	Yes	Took the first and second doses but did not want to take the booster dose	will not continu taking doses	No	Yes	No	No	No	Yes	Rheumatic and immune diseases	9	Female	No	Rheumatic and immune diseases	#NULL!	Yes	#NULL!	#NULL!	Yes	Yes	agree or already took the COVID vaccin	agree to take COVID vaccin	agree but after some time to know COVID vaccine side effect	Hesitant	P fizer
3	2022-05-18 11:21:52	Yes	1	NLI	Monufia	Female	18-29 year	<40 year	Mother	Mother	High school	Mediuem/high educated	Not employed	Not employed	Non Health	No	Enough	Enough	Yes	>5	>5	6	Yes	Took the first and second doses and is awaiting the booster dose	N/A	Yes	No	No	No	No	Yes	HTN	5	Male	No	Liver and kidney diseases	#NULL!	#NULL!	Yes	#NULL!	Yes	Yes	agree or already took the COVID vaccin	agree to take COVID vaccin	agree but after some time to know COVID vaccine side effect	Hesitant	P fizer
5	2022-05-18 23:17:42	Yes	1	NLI	Beheira	Female	50-59 year	>=40 year	Mother	Mother	University education	Mediuem/high educated	Government	Full Time	Non Health	Governmental	Enough and saving	Enough	Yes	>5	>5	6	Yes	Took the first and second doses and is awaiting the booster dose	N/A	No	No	No	No	No	No	No	13	Female	No	Liver and kidney diseases	#NULL!	#NULL!	Yes	#NULL!	Yes	No	agree or already took the COVID vaccin	agree to take COVID vaccin	agree but after some time to know COVID vaccine side effect	Hesitant	Moderna
7	2022-05-20 22:50:35	Yes	1	NLI	Ismailia	Male	40-49 year	>=40 year	Father	Father	University education	Mediuem/high educated	Private	Full Time	Non Health	Private	Enough and saving	Enough	Yes	4-5	5	5	Yes	Took the first and second doses and is awaiting the booster dose	N/A	No	No	No	No	No	No	No	14	Male	Not sure	Rheumatic and immune diseases	#NULL!	Yes	#NULL!	#NULL!	Yes	No	disagree to take COVID vaccine	disagree to take COVID vaccine	disagree to take COVID vaccine	Hesitant	P fizer
11	2022-05-30 10:30:28	Yes	4	NLI	Beheira	Female	30-39 year	<40 year	Mother	Mother	High school	Mediuem/high educated	Not employed	Not employed	Non Health	Governmental	Enough	Enough	Yes	>5	>5	6	No	Wants to take the vaccine, but it is not scheduled yet	vaccination is not available	Yes	No	No	No	No	Yes	HTN	13	Male	No	Liver and kidney diseases	#NULL!	#NULL!	Yes	#NULL!	No	Yes	agree or already took the COVID vaccin	agree to take COVID vaccin	agree but COVID vaccine not available	Hesitant	Don't Know
14	2022-05-30 11:39:44	Yes	1	NLI	Kafr el-Sheikh	Female	40-49 year	>=40 year	Mother	Mother	High school	Mediuem/high educated	Not employed	Not employed	Non Health	No	Not enough; on a loan and cannot pay back	Not Enough	Yes	>5	>5	6	No	Took the first dose but does not want to take the second dose	will not continu taking doses	No	No	No	No	No	No	No	8	Female	No	Liver and kidney diseases	#NULL!	#NULL!	Yes	#NULL!	Yes	No	agree or already took the COVID vaccin	agree to take COVID vaccin	agree but after some time to know COVID vaccine side effect	Hesitant	Don't Know
16	2022-05-30 13:56:49	Yes	1	NLI	Monufia	Male	40-49 year	>=40 year	Father	Father	High school	Mediuem/high educated	Government	Full Time	Non Health	Governmental	Enough	Enough	No	4-5	5	5	No	Does not want to take the vaccine	will not continu taking doses	No	No	No	No	No	No	No	16	Female	No	Liver and kidney diseases, Rheumatic and immune diseases	#NULL!	Yes	Yes	#NULL!	Yes	No	disagree to take COVID vaccine	disagree to take COVID vaccine	disagree to take COVID vaccine	Hesitant	Don't Know
20	2022-06-13 12:15:13	Yes	1	NLI	Alexandria	Female	40-49 year	>=40 year	Mother	Mother	University education	Mediuem/high educated	Not employed	Not employed	Non Health	No	Enough	Enough	No	4-5	5	5	No	Took the first and second doses and is awaiting the booster dose	awaiting the second	No	No	No	No	No	No	No	17	Male	No	Liver and kidney diseases, Rheumatic and immune diseases	#NULL!	Yes	Yes	#NULL!	Yes	No	agree or already took the COVID vaccin	agree to take COVID vaccin	agree but after some time to know COVID vaccine side effect	Hesitant	Don't Know
23	2022-06-13 17:48:43	Yes	1	NLI	Faiyum	Female	30-39 year	<40 year	Mother	Mother	High school	Mediuem/high educated	Not employed	Not employed	Non Health	No	Enough	Enough	No	4-5	5	5	No	Took the first and second doses and is awaiting the booster dose	N/A	No	No	No	No	No	No	No	3	Female	No	Liver and kidney diseases	#NULL!	#NULL!	Yes	#NULL!	Yes	No	agree or already took the COVID vaccin	agree to take COVID vaccin	agree but after 12 years old	Hesitant	Don't Know
25	2022-06-18 18:15:15	Yes	1	NLI	Monufia	Female	30-39 year	<40 year	Mother	Mother	Postgraduate	Mediuem/high educated	Government	Full Time	Health	Governmental	Enough and saving	Enough	No	4-5	5	5	No	Took the three doses	N/A	No	No	No	No	No	No	No	9	Male	No	Rheumatic and immune diseases	#NULL!	Yes	#NULL!	#NULL!	Yes	No	agree or already took the COVID vaccin	agree to take COVID vaccin	agree but after 12 years old	Hesitant	P fizer
27	2022-06-20 11:24:01	Yes	1	NLI	Qalyubia	Female	40-49 year	>=40 year	Mother	Mother	High school	Mediuem/high educated	Not employed	Not employed	Non Health	No	Enough	Enough	Yes	>5	>5	6	No	Does not want to take the vaccine	Worry about vaccination	No	No	No	No	No	No	No	12	Female	No	Liver and kidney diseases	#NULL!	#NULL!	Yes	#NULL!	Yes	No	agree or already took the COVID vaccin	agree to take COVID vaccin	agree but after some time to know COVID vaccine side effect	Hesitant	Don't Know
28	2022-06-20 15:01:04	Yes	1	NLI	Cairo	Male	40-49 year	>=40 year	Father	Father	High school	Mediuem/high educated	Private	Full Time	Non Health	No	Enough	Enough	No	4-5	4	4	No	Took the first dose but does not want to take the second dose	will not continu taking doses	No	No	No	No	No	No	No	12	Female	No	Liver and kidney diseases	#NULL!	#NULL!	Yes	#NULL!	Yes	No	agree or already took the COVID vaccin	agree to take COVID vaccin	agree but after 12 years old	Hesitant	P fizer
29	2022-06-20 15:05:21	Yes	1	NLI	Qalyubia	Female	30-39 year	<40 year	Mother	Mother	High school	Mediuem/high educated	Not employed	Not employed	Non Health	No	Enough	Enough	No	4-5	5	5	No	Took the first and second doses and is awaiting the booster dose	N/A	No	No	No	No	No	No	No	11	Female	No	Liver and kidney diseases	#NULL!	#NULL!	Yes	#NULL!	Yes	No	agree or already took the COVID vaccin	agree to take COVID vaccin	agree but after 12 years old	Hesitant	Don't Know
30	2022-06-20 15:14:22	Yes	1	NLI	Qalyubia	Female	30-39 year	<40 year	Mother	Mother	High school	Mediuem/high educated	Not employed	Not employed	Non Health	No	Enough	Enough	No	>5	>5	6	Yes	Does not want to take the vaccine	Worry about vaccination	No	No	No	Yes	No	Yes	Liver and kidney diseases	9	Male	No	Others	Yes	#NULL!	#NULL!	#NULL!	Yes	No	disagree to take COVID vaccine	disagree to take COVID vaccine	disagree to take COVID vaccine	Hesitant	Don't Know
32	2022-06-26 17:38:20	Yes	1	NLI	Kafr el-Sheikh	Female	18-29 year	<40 year	Mother	Mother	High school	Mediuem/high educated	Not employed	Not employed	Non Health	No	Enough	Enough	No	4-5	5	5	No	Took the first and second doses and is awaiting the booster dose	N/A	No	No	No	No	No	No	No	10	Male	No	Liver and kidney diseases	#NULL!	#NULL!	Yes	#NULL!	Yes	No	agree or already took the COVID vaccin	agree to take COVID vaccin	agree but after some time to know COVID vaccine side effect	Hesitant	Don't Know
34	2022-06-27 11:14:26	Yes	1	NLI	Beheira	Male	30-39 year	<40 year	Mother	Mother	High school	Mediuem/high educated	Not employed	Not employed	Non Health	No	Enough	Enough	No	4-5	5	5	No	Took the first and second doses and is awaiting the booster dose	N/A	No	No	No	No	No	No	No	10	Male	No	Liver and kidney diseases	#NULL!	#NULL!	Yes	#NULL!	Yes	No	agree or already took the COVID vaccin	agree to take COVID vaccin	agree but after 12 years old	Hesitant	P fizer
37	2022-06-30 11:43:25	Yes	1	NLI	Alexandria	Female	30-39 year	<40 year	Mother	Mother	High school	Mediuem/high educated	Not employed	Not employed	Non Health	No	Enough	Enough	Yes	2-3	3	3	No	Took the first and second doses and is awaiting the booster dose	N/A	No	No	No	No	No	No	No	9	Female	No	Liver and kidney diseases	#NULL!	#NULL!	Yes	#NULL!	Yes	No	disagree to take COVID vaccine	disagree to take COVID vaccine	disagree to take COVID vaccine	Hesitant	Disagree to Vaccinate
38	2022-06-30 11:47:16	Yes	1	NLI	Beni Suef	Female	40-49 year	>=40 year	Mother	Mother	University education	Mediuem/high educated	Government	Part time	Non Health	Governmental	Enough	Enough	No	4-5	5	5	Yes	Took the first and second doses and is awaiting the booster dose	N/A	No	No	No	No	No	No	No	16	Female	Yes	Liver and kidney diseases	#NULL!	#NULL!	Yes	#NULL!	Yes	No	agree or already took the COVID vaccin	agree to take COVID vaccin	agree but after some time to know COVID vaccine side effect	Hesitant	P fizer
39	2022-07-04 09:52:58	Yes	1	NLI	Gharbia	Male	more than 60 year	>=40 year	Grandparent	Others	University education	Mediuem/high educated	Government	Not employed	Non Health	Governmental	Enough	Enough	No	4-5	5	5	No	Took the three doses	N/A	No	No	No	No	No	No	No	7	Female	No	Rheumatic and immune diseases	#NULL!	Yes	#NULL!	#NULL!	Yes	No	agree or already took the COVID vaccin	agree to take COVID vaccin	agree but after 12 years old	Hesitant	Don't Know
40	2022-07-04 14:07:56	Yes	1	NLI	Kafr el-Sheikh	Male	40-49 year	>=40 year	Father	Father	High school	Mediuem/high educated	Private	#NULL!	Non Health	No	Enough	Enough	Yes	>5	>5	6	No	Took the first and second doses and is awaiting the booster dose	awaiting the second	No	No	No	No	No	No	No	10	Male	No	Rheumatic and immune diseases	#NULL!	Yes	#NULL!	#NULL!	Yes	No	agree or already took the COVID vaccin	agree to take COVID vaccin	agree but after 12 years old	Hesitant	Don't Know
41	2022-07-18 11:16:08	Yes	1	NLI	Cairo	Female	18-29 year	<40 year	Mother	Mother	High school	Mediuem/high educated	Not employed	Not employed	Non Health	No	Enough	Enough	Yes	4-5	4	4	No	Does not want to take the vaccine	N/A	No	No	No	No	No	No	No	10	Female	No	Liver and kidney diseases	#NULL!	#NULL!	Yes	#NULL!	Yes	No	agree or already took the COVID vaccin	agree to take COVID vaccin	agree but after some time to know COVID vaccine side effect	Hesitant	Don't Know
42	2022-07-18 12:23:59	Yes	1	NLI	Qalyubia	Female	30-39 year	<40 year	Mother	Mother	University education	Mediuem/high educated	Not employed	Not employed	Non Health	No	Enough	Enough	No	2-3	3	3	No	Took the three doses	N/A	No	No	No	No	No	No	No	15	Female	No	Rheumatic and immune diseases	#NULL!	Yes	#NULL!	#NULL!	Yes	Yes	agree or already took the COVID vaccin	agree to take COVID vaccin	agree but after some time to know COVID vaccine side effect	Hesitant	Don't Know
43	2022-07-21 13:46:59	Yes	1	NLI	Sharqia	Female	18-29 year	<40 year	Mother	Mother	High school	Mediuem/high educated	Not employed	Not employed	Non Health	No	Enough	Enough	Yes	4-5	4	4	No	Does not want to take the vaccine	N/A	No	No	No	No	No	No	No	7	Female	No	Liver and kidney diseases	#NULL!	#NULL!	Yes	#NULL!	Yes	No	agree or already took the COVID vaccin	agree to take COVID vaccin	agree but after some time to know COVID vaccine side effect	Hesitant	Don't Know
44	2022-07-21 13:50:55	Yes	1	NLI	Sharqia	Female	40-49 year	>=40 year	Mother	Mother	University education	Mediuem/high educated	Government	Full Time	Non Health	Governmental	Enough	Enough	Yes	4-5	4	4	No	Does not want to take the vaccine	N/A	No	No	No	No	No	No	No	16	Male	No	Liver and kidney diseases	#NULL!	#NULL!	Yes	#NULL!	Yes	No	disagree to take COVID vaccine	disagree to take COVID vaccine	disagree to take COVID vaccine	Hesitant	Disagree to Vaccinate
45	2022-07-21 14:04:17	Yes	1	NLI	Sharqia	Female	30-39 year	<40 year	Mother	Mother	High school	Mediuem/high educated	Not employed	Not employed	Non Health	No	Enough	Enough	No	4-5	4	4	No	Does not want to take the vaccine	N/A	No	No	No	No	No	No	No	8	Male	No	Liver and kidney diseases	#NULL!	#NULL!	Yes	#NULL!	Yes	No	disagree to take COVID vaccine	disagree to take COVID vaccine	disagree to take COVID vaccine	Hesitant	Disagree to Vaccinate
46	2022-07-21 14:07:51	Yes	1	NLI	Sharqia	Male	50-59 year	>=40 year	Father	Father	High school	Mediuem/high educated	Private	Full Time	Health	Private	Enough	Enough	Yes	4-5	5	5	Yes	Took the first and second doses and is awaiting the booster dose	awaiting the second	No	No	No	No	No	No	No	16	Female	No	Liver and kidney diseases	#NULL!	#NULL!	Yes	#NULL!	Yes	No	agree or already took the COVID vaccin	agree to take COVID vaccin	agree but after some time to know COVID vaccine side effect	Hesitant	P fizer
48	2022-07-21 14:17:40	Yes	1	NLI	Cairo	Female	30-39 year	<40 year	Mother	Mother	High school	Mediuem/high educated	Not employed	Not employed	Non Health	No	Enough	Enough	No	4-5	5	5	No	Took the first and second doses and is awaiting the booster dose	awaiting the second	No	No	No	No	No	No	No	4	Male	No	Liver and kidney diseases	#NULL!	#NULL!	Yes	#NULL!	Yes	No	disagree to take COVID vaccine	disagree to take COVID vaccine	disagree to take COVID vaccine	Hesitant	Disagree to Vaccinate
51	2022-08-01 10:13:36	Yes	1	NLI	Damietta	Male	30-39 year	<40 year	Father	Father	University education	Mediuem/high educated	Private	Full Time	Non Health	Private	Enough and saving	Enough	No	4-5	5	5	Yes	Took the first and second doses and is awaiting the booster dose	N/A	No	No	No	No	No	No	No	9	Female	No	Liver and kidney diseases	#NULL!	#NULL!	Yes	#NULL!	Yes	No	agree or already took the COVID vaccin	agree to take COVID vaccin	agree but after some time to know COVID vaccine side effect	Hesitant	P fizer or Moderna
53	2022-08-01 10:23:58	Yes	1	NLI	Monufia	Female	40-49 year	>=40 year	Mother	Mother	University education	Mediuem/high educated	Government	Full Time	Non Health	Governmental	Enough	Enough	No	4-5	5	5	No	Took the first and second doses and is awaiting the booster dose	N/A	No	No	No	No	No	No	No	10	Female	No	Liver and kidney diseases	#NULL!	#NULL!	Yes	#NULL!	Yes	No	agree or already took the COVID vaccin	agree to take COVID vaccin	agree but after 12 years old	Hesitant	P fizer
54	2022-08-01 10:28:18	Yes	1	NLI	Kafr el-Sheikh	Female	40-49 year	>=40 year	Mother	Mother	High school	Mediuem/high educated	Not employed	Not employed	Non Health	No	Enough	Enough	No	4-5	5	5	Yes	Took the first and second doses and is awaiting the booster dose	N/A	No	No	No	No	No	No	No	14	Female	No	Liver and kidney diseases	#NULL!	#NULL!	Yes	#NULL!	Yes	No	agree or already took the COVID vaccin	agree to take COVID vaccin	agree but after some time to know COVID vaccine side effect	Hesitant	Don't Know
56	2022-08-05 13:11:16	Yes	1	NLI	Beheira	Female	40-49 year	>=40 year	Mother	Mother	High school	Mediuem/high educated	Not employed	Not employed	Non Health	No	Enough	Enough	No	4-5	5	5	Yes	Took the first dose and is awaiting the second	N/A	No	No	No	No	No	No	No	14	Female	No	Rheumatic and immune diseases	#NULL!	Yes	#NULL!	#NULL!	Yes	No	agree or already took the COVID vaccin	agree to take COVID vaccin	agree but after some time to know COVID vaccine side effect	Hesitant	P fizer
61	2022-08-11 13:10:50	Yes	1	NLI	Matruh	Male	30-39 year	<40 year	Mother	Mother	University education	Mediuem/high educated	Not employed	Not employed	Non Health	No	Enough	Enough	No	4-5	5	5	No	Took the first and second doses and is awaiting the booster dose	awaiting the second	No	No	No	No	No	No	No	15	Male	No	Liver and kidney diseases, Rheumatic and immune diseases	#NULL!	Yes	Yes	#NULL!	Yes	No	agree or already took the COVID vaccin	agree to take COVID vaccin	agree but after some time to know COVID vaccine side effect	Hesitant	Don't Know
62	2022-08-18 21:42:42	Yes	1	NLI	Gharbia	Female	30-39 year	<40 year	Mother	Mother	High school	Mediuem/high educated	Not employed	Not employed	Non Health	No	Enough	Enough	No	4-5	5	5	No	Took the first and second doses and is awaiting the booster dose	N/A	No	No	No	No	No	No	No	8	Female	No	Liver and kidney diseases	#NULL!	#NULL!	Yes	#NULL!	Yes	No	agree or already took the COVID vaccin	agree to take COVID vaccin	agree but after 12 years old	Hesitant	P fizer
63	2022-08-18 21:46:24	Yes	1	NLI	Gharbia	Female	18-29 year	<40 year	Mother	Mother	High school	Mediuem/high educated	Not employed	Not employed	Non Health	No	Enough and saving	Enough	Yes	4-5	4	4	No	Took the first and second doses and is awaiting the booster dose	N/A	No	No	No	No	No	No	No	10	Female	No	Liver and kidney diseases, Rheumatic and immune diseases	#NULL!	Yes	Yes	#NULL!	Yes	No	agree or already took the COVID vaccin	agree to take COVID vaccin	agree but after some time to know COVID vaccine side effect	Hesitant	Moderna
64	2022-08-18 21:50:40	Yes	1	NLI	Beni Suef	Male	40-49 year	>=40 year	Father	Father	University education	Mediuem/high educated	Government	Full Time	Non Health	Governmental	Enough	Enough	Yes	>5	>5	6	No	Took the first and second doses and is awaiting the booster dose	N/A	No	No	No	No	No	No	No	12	Female	No	Liver and kidney diseases, Rheumatic and immune diseases	#NULL!	Yes	Yes	#NULL!	Yes	No	agree or already took the COVID vaccin	agree to take COVID vaccin	agree but after some time to know COVID vaccine side effect	Hesitant	P fizer
66	2022-08-18 21:58:50	Yes	1	NLI	Kafr el-Sheikh	Female	18-29 year	<40 year	Mother	Mother	High school	Mediuem/high educated	Not employed	Not employed	Non Health	No	Not enough; on a loan but can pay back	Not Enough	Yes	>5	>5	6	No	Took the three doses	N/A	No	No	No	No	No	No	No	11	Male	No	Liver and kidney diseases	#NULL!	#NULL!	Yes	#NULL!	Yes	No	agree or already took the COVID vaccin	agree to take COVID vaccin	agree but after 12 years old	Hesitant	P fizer
67	2022-08-18 22:02:33	Yes	1	NLI	Beheira	Female	40-49 year	>=40 year	Mother	Mother	University education	Mediuem/high educated	Not employed	Not employed	Non Health	No	Enough and saving	Enough	No	2-3	3	3	No	Took the first and second doses and is awaiting the booster dose	N/A	No	No	No	No	No	No	No	11	Female	No	Liver and kidney diseases	#NULL!	#NULL!	Yes	#NULL!	Yes	No	agree or already took the COVID vaccin	agree to take COVID vaccin	agree but after 12 years old	Hesitant	P fizer or Moderna
68	2022-08-18 22:07:20	Yes	1	NLI	Kafr el-Sheikh	Female	40-49 year	>=40 year	Mother	Mother	High school	Mediuem/high educated	Not employed	Not employed	Non Health	No	Enough and saving	Enough	No	4-5	5	5	No	Wants to take the vaccine, but it is not scheduled yet	N/A	No	No	No	No	No	No	No	4	Male	No	Liver and kidney diseases	#NULL!	#NULL!	Yes	#NULL!	Yes	No	agree or already took the COVID vaccin	agree to take COVID vaccin	agree but after some time to know COVID vaccine side effect	Hesitant	P fizer or Moderna
72	2022-08-18 22:22:41	Yes	1	NLI	Monufia	Female	30-39 year	<40 year	Mother	Mother	High school	Mediuem/high educated	Not employed	Not employed	Non Health	No	Enough	Enough	No	4-5	5	5	Yes	Does not want to take the vaccine	N/A	No	No	No	No	No	No	No	13	Male	No	Liver and kidney diseases, Rheumatic and immune diseases	#NULL!	Yes	Yes	#NULL!	Yes	No	disagree to take COVID vaccine	disagree to take COVID vaccine	disagree to take COVID vaccine	Hesitant	Disagree to Vaccinate
73	2022-08-23 18:32:57	Yes	1	NLI	Suez	Female	40-49 year	>=40 year	Mother	Mother	University education	Mediuem/high educated	Government	Full Time	Non Health	Governmental	Enough and saving	Enough	No	4-5	5	5	No	Took the first dose but does not want to take the second dose	will not continu taking doses	No	No	No	No	No	No	No	15	Male	No	Liver and kidney diseases, Rheumatic and immune diseases	#NULL!	Yes	Yes	#NULL!	Yes	No	disagree to take COVID vaccine	disagree to take COVID vaccine	disagree to take COVID vaccine	Hesitant	Disagree to Vaccinate
76	2022-08-23 18:44:52	Yes	1	NLI	Monufia	Female	40-49 year	>=40 year	Mother	Mother	High school	Mediuem/high educated	Not employed	Not employed	Non Health	No	Enough	Enough	No	4-5	5	5	No	Took the three doses	N/A	No	No	No	No	No	No	No	10	Female	No	Liver and kidney diseases, Rheumatic and immune diseases	#NULL!	Yes	Yes	#NULL!	Yes	No	agree or already took the COVID vaccin	agree to take COVID vaccin	agree but after some time to know COVID vaccine side effect	Hesitant	P fizer or Moderna
78	2022-08-31 11:59:51	Yes	1	NLI	Gharbia	Female	40-49 year	>=40 year	Mother	Mother	University education	Mediuem/high educated	Government	Full Time	Non Health	Governmental	Enough	Enough	No	4-5	4	4	Yes	Took the first dose and is awaiting the second	will not continu taking doses	No	No	No	No	No	No	No	5	Female	No	Liver and kidney diseases, Rheumatic and immune diseases	#NULL!	Yes	Yes	#NULL!	Yes	No	disagree to take COVID vaccine	disagree to take COVID vaccine	disagree to take COVID vaccine	Hesitant	Disagree to Vaccinate
80	2022-09-02 18:47:04	Yes	1	NLI	Monufia	Female	30-39 year	<40 year	Mother	Mother	University education	Mediuem/high educated	Not employed	Not employed	Non Health	No	Enough	Enough	No	4-5	5	5	No	Took the three doses	N/A	No	No	No	No	No	No	No	16	Male	No	Liver and kidney diseases, Rheumatic and immune diseases	#NULL!	Yes	Yes	#NULL!	Yes	No	agree or already took the COVID vaccin	agree to take COVID vaccin	agree but after some time to know COVID vaccine side effect	Hesitant	Don't Know
87	2022-09-05 17:24:26	Yes	1	NLI	Beni Suef	Female	18-29 year	<40 year	Mother	Mother	High school	Mediuem/high educated	Not employed	Not employed	Non Health	No	Enough	Enough	Yes	>5	>5	6	No	Took the first dose and is awaiting the second	N/A	No	No	No	No	No	No	No	13	Female	No	Liver and kidney diseases, Rheumatic and immune diseases	#NULL!	Yes	Yes	#NULL!	No	No	agree or already took the COVID vaccin	agree to take COVID vaccin	agree but after 12 years old	Hesitant	P fizer
88	2022-09-12 21:28:09	Yes	1	NLI	Kafr el-Sheikh	Female	40-49 year	>=40 year	Mother	Mother	High school	Mediuem/high educated	Not employed	Not employed	Non Health	No	Enough	Enough	No	4-5	5	5	No	Took the first dose and is awaiting the second	N/A	No	No	No	No	No	No	No	12	Male	No	Liver and kidney diseases	#NULL!	#NULL!	Yes	#NULL!	Yes	No	agree or already took the COVID vaccin	agree to take COVID vaccin	agree but after some time to know COVID vaccine side effect	Hesitant	P fizer or Moderna
91	2022-09-14 10:39:35	Yes	1	NLI	Beheira	Female	30-39 year	<40 year	Mother	Mother	High school	Mediuem/high educated	Not employed	Not employed	Non Health	No	Enough and saving	Enough	No	4-5	5	5	Yes	Wants to take the vaccine, but it is not scheduled yet	N/A	No	No	No	No	No	No	No	9	Male	No	Liver and kidney diseases, Rheumatic and immune diseases	#NULL!	Yes	Yes	#NULL!	Yes	No	agree or already took the COVID vaccin	agree to take COVID vaccin	agree but after some time to know COVID vaccine side effect	Hesitant	P fizer or Moderna
92	2022-09-14 10:55:24	Yes	1	NLI	Monufia	Female	30-39 year	<40 year	Mother	Mother	High school	Mediuem/high educated	Not employed	Not employed	Non Health	No	Enough and saving	Enough	No	4-5	4	4	Yes	Took the first dose and is awaiting the second	N/A	No	No	No	No	No	No	No	6	Male	No	Liver and kidney diseases	#NULL!	#NULL!	Yes	#NULL!	Yes	No	agree or already took the COVID vaccin	agree to take COVID vaccin	agree but after 12 years old	Hesitant	Don't Know
95	2022-09-14 11:42:28	Yes	1	NLI	Monufia	Female	18-29 year	<40 year	Mother	Mother	High school	Mediuem/high educated	Not employed	Not employed	Non Health	No	Enough	Enough	No	4-5	4	4	Yes	Took the first dose and is awaiting the second	awaiting the second	No	No	No	No	No	No	No	4	Female	No	Liver and kidney diseases	#NULL!	#NULL!	Yes	#NULL!	Yes	Yes	agree or already took the COVID vaccin	agree to take COVID vaccin	agree but after 12 years old	Hesitant	P fizer
96	2022-09-14 11:46:27	Yes	1	NLI	Kafr el-Sheikh	Female	18-29 year	<40 year	Mother	Mother	High school	Mediuem/high educated	Not employed	Not employed	Non Health	No	Enough and saving	Enough	Yes	>5	>5	6	No	Wants to take the vaccine, but it is not scheduled yet	will not continu taking doses	No	No	No	No	No	No	No	4	Female	No	Liver and kidney diseases	#NULL!	#NULL!	Yes	#NULL!	Yes	Yes	disagree to take COVID vaccine	disagree to take COVID vaccine	disagree to take COVID vaccine	Hesitant	Disagree to Vaccinate
97	2022-09-14 11:50:38	Yes	1	NLI	Kafr el-Sheikh	Female	40-49 year	>=40 year	Mother	Mother	University education	Mediuem/high educated	Not employed	Not employed	Non Health	No	Enough and saving	Enough	No	4-5	5	5	No	Took the first and second doses and is awaiting the booster dose	N/A	No	No	No	No	No	No	No	8	Female	No	Rheumatic and immune diseases	#NULL!	Yes	#NULL!	#NULL!	Yes	No	agree or already took the COVID vaccin	agree to take COVID vaccin	agree but after 12 years old	Hesitant	P fizer or Moderna
98	2022-09-15 14:47:54	Yes	1	NLI	Gharbia	Female	40-49 year	>=40 year	Mother	Mother	High school	Mediuem/high educated	Not employed	Not employed	Non Health	No	Enough and saving	Enough	Yes	4-5	5	5	No	Took the first dose and is awaiting the second	awaiting the second	No	No	No	No	No	No	No	14	Male	No	Liver and kidney diseases, Rheumatic and immune diseases	#NULL!	Yes	Yes	#NULL!	Yes	No	agree or already took the COVID vaccin	agree to take COVID vaccin	agree but after some time to know COVID vaccine side effect	Hesitant	Don't Know
100	2022-09-15 14:56:35	Yes	1	NLI	Alexandria	Male	40-49 year	>=40 year	Father	Father	High school	Mediuem/high educated	Government	Full Time	Non Health	Governmental	Enough	Enough	Yes	4-5	5	5	No	Took the first and second doses and is awaiting the booster dose	N/A	No	No	No	No	No	No	No	13	Male	No	Liver and kidney diseases, Rheumatic and immune diseases	#NULL!	Yes	Yes	#NULL!	Yes	No	agree or already took the COVID vaccin	agree to take COVID vaccin	agree but after some time to know COVID vaccine side effect	Hesitant	P fizer or Moderna
110	2022-09-16 16:02:25	Yes	1	NLI	Alexandria	Female	30-39 year	<40 year	Mother	Mother	High school	Mediuem/high educated	Not employed	Not employed	Non Health	No	Enough	Enough	No	4-5	4	4	No	Took the first dose and is awaiting the second	awaiting the second	No	No	No	No	No	No	No	15	Female	No	Liver and kidney diseases, Rheumatic and immune diseases	#NULL!	Yes	Yes	#NULL!	Yes	No	agree or already took the COVID vaccin	agree to take COVID vaccin	agree but after some time to know COVID vaccine side effect	Hesitant	P fizer or Moderna
115	2022-09-17 11:14:20	Yes	1	NLI	Beheira	Female	30-39 year	<40 year	Mother	Mother	High school	Mediuem/high educated	Not employed	Not employed	Non Health	No	Enough	Enough	No	4-5	5	5	No	Took the first and second doses and is awaiting the booster dose	N/A	No	No	No	No	No	No	No	15	Female	No	Liver and kidney diseases, Rheumatic and immune diseases	#NULL!	Yes	Yes	#NULL!	Yes	No	agree or already took the COVID vaccin	agree to take COVID vaccin	agree but after some time to know COVID vaccine side effect	Hesitant	P fizer
121	2022-09-17 11:48:43	Yes	1	NLI	Beheira	Male	40-49 year	>=40 year	Father	Father	High school	Mediuem/high educated	Government	Full Time	Non Health	Governmental	Enough	Enough	No	4-5	5	5	Yes	Took the first and second doses and is awaiting the booster dose	N/A	No	No	No	No	No	No	No	16	Female	No	Liver and kidney diseases, Rheumatic and immune diseases	#NULL!	Yes	Yes	#NULL!	Yes	No	agree or already took the COVID vaccin	agree to take COVID vaccin	agree but after some time to know COVID vaccine side effect	Hesitant	P fizer or Moderna
122	2022-09-17 11:52:04	Yes	1	NLI	Giza	Male	40-49 year	>=40 year	Father	Father	High school	Mediuem/high educated	Government	Full Time	Non Health	Governmental	Enough	Enough	No	4-5	5	5	Yes	Took the three doses	N/A	No	No	No	No	No	No	No	15	Female	No	Liver and kidney diseases, Rheumatic and immune diseases	#NULL!	Yes	Yes	#NULL!	Yes	No	disagree to take COVID vaccine	disagree to take COVID vaccine	disagree to take COVID vaccine	Hesitant	Disagree to Vaccinate
125	2022-09-17 12:26:31	Yes	1	NLI	Gharbia	Female	40-49 year	>=40 year	Mother	Mother	University education	Mediuem/high educated	Government	Full Time	Non Health	Governmental	Enough	Enough	No	4-5	5	5	No	Took the first and second doses and is awaiting the booster dose	N/A	No	No	No	No	No	No	No	13	Female	No	Liver and kidney diseases, Rheumatic and immune diseases	#NULL!	Yes	Yes	#NULL!	Yes	No	disagree to take COVID vaccine	disagree to take COVID vaccine	disagree to take COVID vaccine	Hesitant	Disagree to Vaccinate
126	2022-09-17 12:29:05	Yes	1	NLI	Sharqia	Male	50-59 year	>=40 year	Father	Father	High school	Mediuem/high educated	Government	Full Time	Non Health	Governmental	Enough	Enough	No	>5	>5	6	No	Took the first and second doses and is awaiting the booster dose	N/A	Yes	No	No	No	No	Yes	HTN	17	Female	No	Liver and kidney diseases, Rheumatic and immune diseases	#NULL!	Yes	Yes	#NULL!	Yes	No	agree or already took the COVID vaccin	agree to take COVID vaccin	agree but after some time to know COVID vaccine side effect	Hesitant	P fizer
127	2022-09-18 15:17:25	Yes	1	NLI	Monufia	Female	30-39 year	<40 year	Mother	Mother	High school	Mediuem/high educated	Not employed	Not employed	Non Health	No	Enough	Enough	No	4-5	5	5	No	Does not want to take the vaccine	N/A	No	No	No	No	No	No	No	11	Female	No	Liver and kidney diseases	#NULL!	#NULL!	Yes	#NULL!	Yes	No	agree or already took the COVID vaccin	agree to take COVID vaccin	agree but after some time to know COVID vaccine side effect	Hesitant	P fizer or Moderna
128	2022-09-18 15:19:48	Yes	1	NLI	Sharqia	Male	40-49 year	>=40 year	Father	Father	High school	Mediuem/high educated	Government	Full Time	Non Health	Governmental	Enough	Enough	No	4-5	5	5	No	Took the three doses	N/A	No	No	No	No	No	No	No	14	Male	No	Liver and kidney diseases	#NULL!	#NULL!	Yes	#NULL!	Yes	No	agree or already took the COVID vaccin	agree to take COVID vaccin	agree but after some time to know COVID vaccine side effect	Hesitant	P fizer or Moderna
130	2022-09-21 11:13:50	Yes	1	NLI	Gharbia	Female	30-39 year	<40 year	Mother	Mother	University education	Mediuem/high educated	Not employed	Not employed	Non Health	No	Enough and saving	Enough	No	4-5	5	5	No	Took the first and second doses and is awaiting the booster dose	N/A	No	No	No	No	No	No	No	13	Female	No	Liver and kidney diseases, Rheumatic and immune diseases	#NULL!	Yes	Yes	#NULL!	Yes	No	agree or already took the COVID vaccin	agree to take COVID vaccin	agree but after some time to know COVID vaccine side effect	Hesitant	P fizer or Moderna
131	2022-09-21 11:17:25	Yes	1	NLI	Qalyubia	Male	40-49 year	>=40 year	Father	Father	High school	Mediuem/high educated	Private	Full Time	Non Health	Private	Enough	Enough	No	4-5	4	4	No	Took the first dose and is awaiting the second	awaiting the second	No	No	No	No	No	No	No	12	Female	No	Liver and kidney diseases, Rheumatic and immune diseases	#NULL!	Yes	Yes	#NULL!	Yes	No	disagree to take COVID vaccine	disagree to take COVID vaccine	disagree to take COVID vaccine	Hesitant	Disagree to Vaccinate
134	2022-09-21 11:46:11	Yes	1	NLI	Kafr el-Sheikh	Male	40-49 year	>=40 year	Father	Father	High school	Mediuem/high educated	Government	Full Time	Non Health	Governmental	Enough	Enough	No	>5	>5	6	No	Does not want to take the vaccine	N/A	No	No	No	No	No	No	No	14	Female	No	Liver and kidney diseases, Rheumatic and immune diseases	#NULL!	Yes	Yes	#NULL!	Yes	No	disagree to take COVID vaccine	disagree to take COVID vaccine	disagree to take COVID vaccine	Hesitant	Disagree to Vaccinate
137	2022-09-22 20:41:25	Yes	1	NLI	Beni Suef	Male	18-29 year	<40 year	Others	Others	University education	Mediuem/high educated	Private	Full Time	Non Health	Private	Enough	Enough	Yes	>5	>5	6	No	Took the first and second doses and is awaiting the booster dose	N/A	No	No	No	No	No	No	No	8	Female	No	Liver and kidney diseases, Rheumatic and immune diseases	#NULL!	Yes	Yes	#NULL!	Yes	No	agree or already took the COVID vaccin	agree to take COVID vaccin	agree but after 12 years old	Hesitant	P fizer or Moderna
138	2022-09-22 20:44:35	Yes	1	NLI	Gharbia	Female	30-39 year	<40 year	Mother	Mother	High school	Mediuem/high educated	Not employed	Not employed	Non Health	No	Enough	Enough	No	4-5	5	5	No	Took the first and second doses and is awaiting the booster dose	N/A	No	No	No	No	No	No	No	14	Male	No	Liver and kidney diseases, Rheumatic and immune diseases	#NULL!	Yes	Yes	#NULL!	Yes	No	disagree to take COVID vaccine	disagree to take COVID vaccine	disagree to take COVID vaccine	Hesitant	Disagree to Vaccinate
139	2022-09-22 20:47:44	Yes	1	NLI	Sharqia	Female	30-39 year	<40 year	Mother	Mother	High school	Mediuem/high educated	Not employed	Not employed	Non Health	No	Enough	Enough	No	4-5	4	4	No	Wants to take the vaccine, but it is not scheduled yet	pregnancy and lactation	No	No	No	No	No	No	No	9	Male	No	Liver and kidney diseases, Rheumatic and immune diseases	#NULL!	Yes	Yes	#NULL!	Yes	No	agree or already took the COVID vaccin	agree to take COVID vaccin	agree but after 12 years old	Hesitant	P fizer or Moderna
140	2022-09-22 20:50:41	Yes	1	NLI	Monufia	Female	30-39 year	<40 year	Mother	Mother	High school	Mediuem/high educated	Not employed	Not employed	Non Health	No	Enough	Enough	No	4-5	5	5	No	Does not want to take the vaccine	N/A	No	No	No	No	No	No	No	12	Female	No	Liver and kidney diseases, Rheumatic and immune diseases	#NULL!	Yes	Yes	#NULL!	Yes	No	agree or already took the COVID vaccin	agree to take COVID vaccin	agree but after some time to know COVID vaccine side effect	Hesitant	Don't Know
141	2022-09-23 11:12:29	Yes	1	NLI	Suez	Female	40-49 year	>=40 year	Mother	Mother	High school	Mediuem/high educated	Not employed	Not employed	Non Health	No	Enough	Enough	No	4-5	5	5	No	Took the first and second doses and is awaiting the booster dose	N/A	No	No	No	No	No	No	No	10	Female	No	Liver and kidney diseases, Rheumatic and immune diseases	#NULL!	Yes	Yes	#NULL!	Yes	No	agree or already took the COVID vaccin	agree to take COVID vaccin	agree but after 12 years old	Hesitant	P fizer
144	2022-09-23 19:54:48	Yes	1	NLI	Alexandria	Female	30-39 year	<40 year	Mother	Mother	University education	Mediuem/high educated	Government	Full Time	Non Health	Governmental	Enough and saving	Enough	Yes	4-5	5	5	No	Took the first and second doses and is awaiting the booster dose	N/A	No	No	No	No	No	No	No	12	Male	No	Liver and kidney diseases, Rheumatic and immune diseases	#NULL!	Yes	Yes	#NULL!	Yes	No	agree or already took the COVID vaccin	agree to take COVID vaccin	agree but after some time to know COVID vaccine side effect	Hesitant	P fizer
145	2022-09-23 19:58:08	Yes	1	NLI	Beheira	Female	30-39 year	<40 year	Mother	Mother	High school	Mediuem/high educated	Not employed	Not employed	Non Health	No	Enough	Enough	No	4-5	4	4	No	Took the first dose and is awaiting the second	awaiting the second	No	Yes	No	Yes	No	Yes	Rheumatic and immune diseases& kidney and liver diseases	14	Male	No	Liver and kidney diseases, Rheumatic and immune diseases	#NULL!	Yes	Yes	#NULL!	Yes	No	agree or already took the COVID vaccin	agree to take COVID vaccin	agree but after some time to know COVID vaccine side effect	Hesitant	P fizer or Moderna
149	2022-09-23 20:14:13	Yes	1	NLI	Monufia	Female	40-49 year	>=40 year	Mother	Mother	High school	Mediuem/high educated	Government	Full Time	Health	Governmental	Enough	Enough	Yes	4-5	5	5	No	Took the first and second doses and is awaiting the booster dose	N/A	No	No	No	No	No	No	No	15	Female	No	Liver and kidney diseases, Rheumatic and immune diseases	#NULL!	Yes	Yes	#NULL!	Yes	No	disagree to take COVID vaccine	disagree to take COVID vaccine	disagree to take COVID vaccine	Hesitant	Disagree to Vaccinate
153	2022-09-23 20:29:33	Yes	1	NLI	Alexandria	Male	40-49 year	>=40 year	Father	Father	High school	Mediuem/high educated	Government	Full Time	Non Health	No	Enough and saving	Enough	Yes	>5	>5	6	Yes	Took the first dose and is awaiting the second	awaiting the second	No	No	No	No	No	No	No	17	Male	No	Liver and kidney diseases, Rheumatic and immune diseases	#NULL!	Yes	Yes	#NULL!	Yes	No	disagree to take COVID vaccine	disagree to take COVID vaccine	disagree to take COVID vaccine	Hesitant	Disagree to Vaccinate
159	2022-09-26 19:38:15	Yes	1	NLI	Beheira	Male	40-49 year	>=40 year	Father	Father	University education	Mediuem/high educated	Government	Full Time	Non Health	Governmental	Enough	Enough	No	4-5	5	5	No	Took the first and second doses and is awaiting the booster dose	N/A	No	No	No	No	No	No	No	17	Male	No	Liver and kidney diseases, Rheumatic and immune diseases	#NULL!	Yes	Yes	#NULL!	Yes	No	disagree to take COVID vaccine	disagree to take COVID vaccine	disagree to take COVID vaccine	Hesitant	Disagree to Vaccinate
165	2022-09-26 20:26:09	Yes	1	NLI	Faiyum	Male	30-39 year	<40 year	Father	Father	High school	Mediuem/high educated	Government	Full Time	Non Health	Governmental	Enough	Enough	Yes	>5	>5	6	Yes	Took the first dose and is awaiting the second	awaiting the second	No	No	No	No	No	No	No	11	Male	No	Liver and kidney diseases, Rheumatic and immune diseases	#NULL!	Yes	Yes	#NULL!	Yes	No	disagree to take COVID vaccine	disagree to take COVID vaccine	disagree to take COVID vaccine	Hesitant	Disagree to Vaccinate
168	2022-09-27 10:52:36	Yes	1	NLI	Kafr el-Sheikh	Male	40-49 year	>=40 year	Father	Father	University education	Mediuem/high educated	Government	Full Time	Non Health	No	Enough	Enough	No	>5	>5	6	Yes	Took the first and second doses and is awaiting the booster dose	N/A	No	No	No	No	No	No	No	12	Male	No	Liver and kidney diseases	#NULL!	#NULL!	Yes	#NULL!	Yes	No	agree or already took the COVID vaccin	agree to take COVID vaccin	agree but after some time to know COVID vaccine side effect	Hesitant	P fizer or Moderna
171	2022-09-27 18:05:32	Yes	1	NLI	Beheira	Female	18-29 year	<40 year	Others	Others	University education	Mediuem/high educated	Not employed	Not employed	Non Health	No	Enough	Enough	No	>5	>5	6	No	Took the first and second doses and is awaiting the booster dose	N/A	No	No	No	No	No	No	No	13	Female	No	Liver and kidney diseases, Rheumatic and immune diseases	#NULL!	Yes	11	#NULL!	Yes	No	disagree to take COVID vaccine	disagree to take COVID vaccine	disagree to take COVID vaccine	Hesitant	Disagree to Vaccinate
173	2022-09-27 18:16:25	Yes	1	NLI	Damietta	Male	50-59 year	>=40 year	Father	Father	University education	Mediuem/high educated	Government	Full Time	Non Health	No	Enough	Enough	No	4-5	5	5	No	Took the three doses	N/A	Yes	No	No	No	No	Yes	HTN	13	Female	No	Liver and kidney diseases, Rheumatic and immune diseases	#NULL!	Yes	Yes	#NULL!	Yes	No	agree or already took the COVID vaccin	agree to take COVID vaccin	agree but after some time to know COVID vaccine side effect	Hesitant	P fizer or Moderna
31	2022-06-22 17:25:54	Yes	1	NLI	Alexandria	Female	40-49 year	>=40 year	Mother	Mother	High school	Mediuem/high educated	Not employed	Not employed	Non Health	No	Enough	Enough	Yes	4-5	5	5	Yes	Took the first dose and is awaiting the second	will not continu taking doses	No	No	No	No	No	No	No	10	Female	No	Liver and kidney diseases	#NULL!	#NULL!	Yes	#NULL!	Yes	No	agree or already took the COVID vaccin	agree to take COVID vaccin	agree but after 12 years old	Hesitant	Don't Know
166	2022-09-26 20:32:56	Yes	1	NLI	Sharqia	Male	40-49 year	>=40 year	Father	Father	High school	Mediuem/high educated	Government	Full Time	Non Health	Governmental	Enough	Enough	No	4-5	5	5	Not Sure	Took the first and second doses and is awaiting the booster dose	N/A	No	No	No	No	No	No	No	11	Female	No	Liver and kidney diseases, Rheumatic and immune diseases	#NULL!	Yes	Yes	#NULL!	Yes	No	agree or already took the COVID vaccin	agree to take COVID vaccin	agree but after some time to know COVID vaccine side effect	Hesitant	P fizer or Moderna
[truncated: 35 more columns]
